# Supplementary material for: Roles of Traditional and Next-Generation Probiotics on Non-Alcoholic Fatty Liver Disease (NAFLD) and Non-Alcoholic Steatohepatitis (NASH): A Systematic Review and Network Meta-Analysis
Source: MDPI journal article supplement (doi:10.3390/antiox13030329), 2024-03-07
Supplement: s1 [file s1]

A

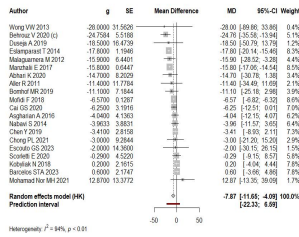

B

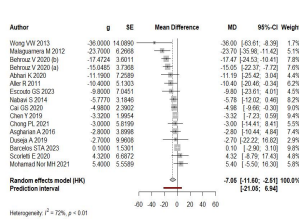

C

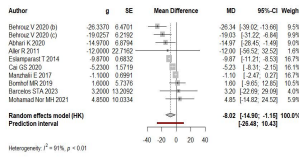

D

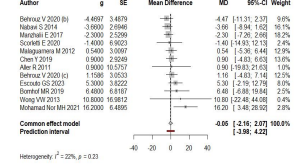

E

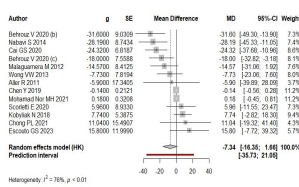

F

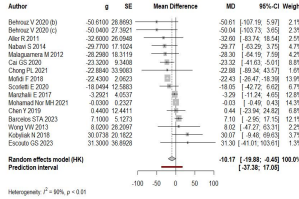

G

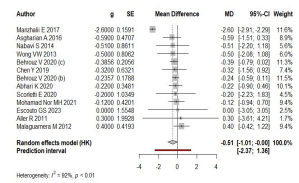

H

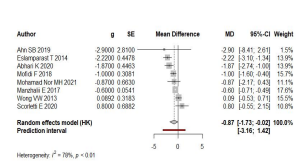

**Supplementary Figure S1.** Meta-analysis of pooled clinical studies for (A) alanine aminotransferase (ALT), (B) aspartate transaminase (AST), (C) gamma glutamyl transferase (GGT), (D) fasting blood glucose (FBG), (E) total cholesterol (TC), (F) triglycerides (TG), (G) body Mass Index (BMI), and (H) fibroscan CAP score. Forest plot is represented by mean with 95% confidence interval.

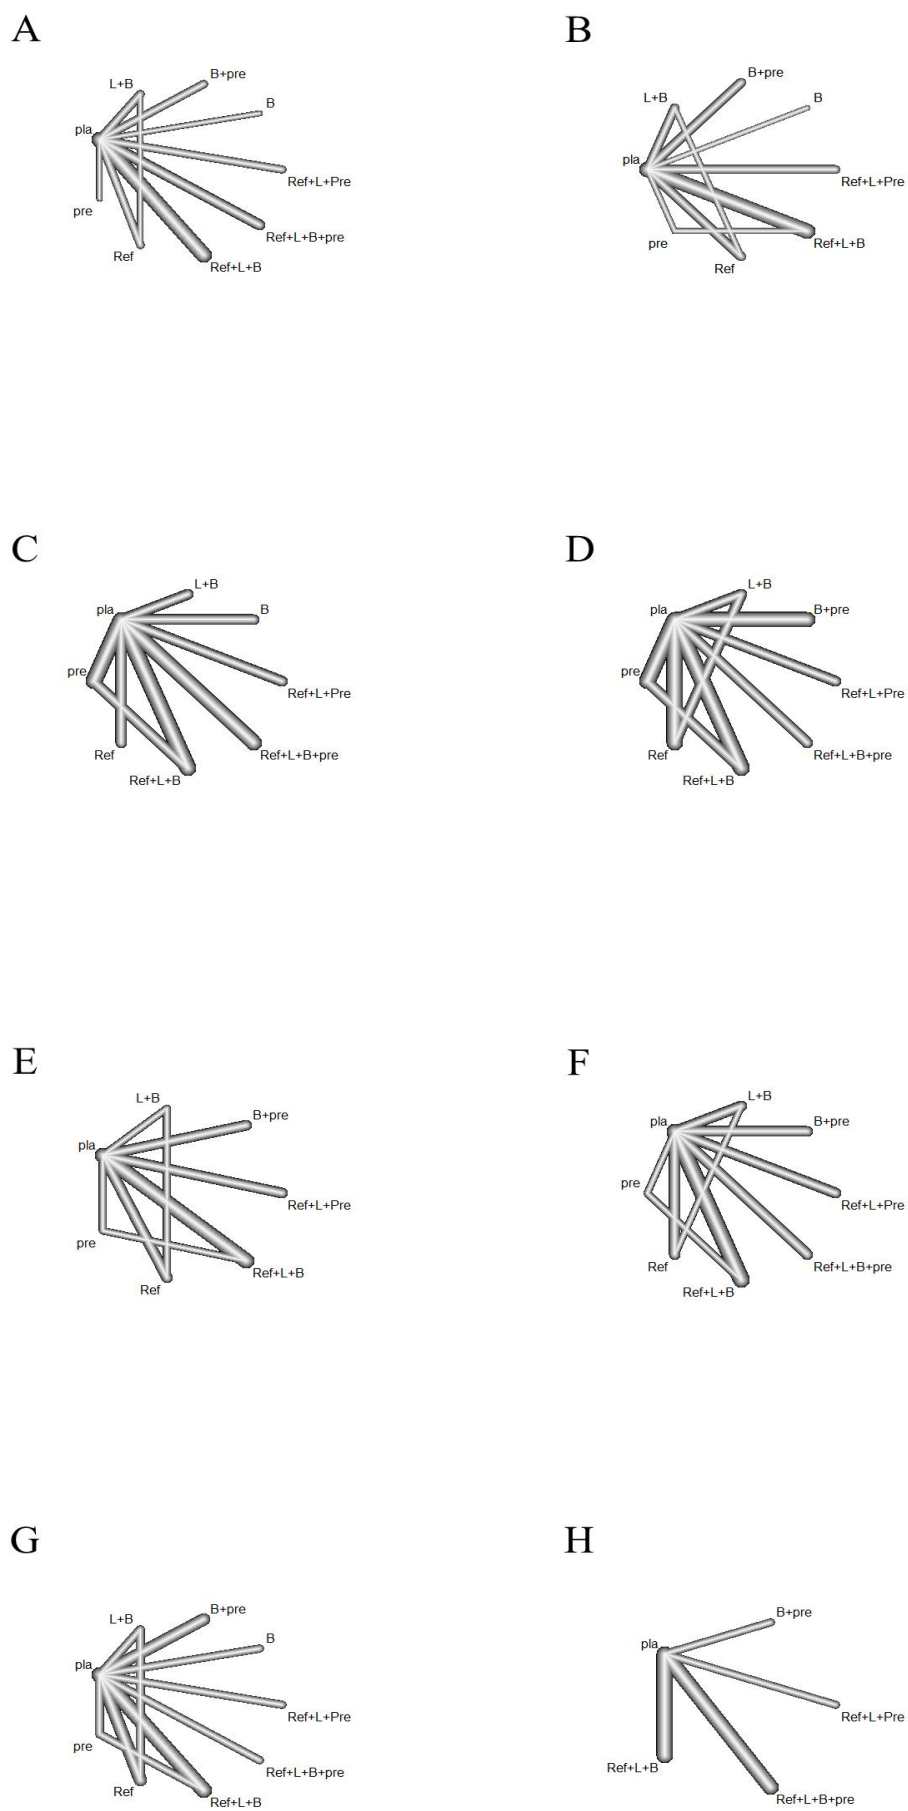

**Supplementary Figure S2.** Network plot of different traditional probiotics either alone or combination for (A) alanine aminotransferase (ALT), (B) aspartate transaminase (AST), (C) gamma glutamyl transferase (GGT), (D) fasting blood glucose (FBG), (E) total cholesterol (TC), (F) triglycerides (TG), (G) body Mass Index (BMI) and (H) fibroscan CAP score. Thicker lines typically signify that there are more studies comparing the two treatments, which also indicates a higher precision in assessing the effect size between the two therapies. B: *Bifidobacterium*; L: *Lactobacillus*; Pla: control group; Pre: prebiotics; Ref: *Streptococcus thermophilus* and *Lactobacillus bulgaricus*.

A

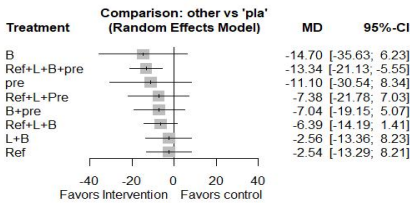

B

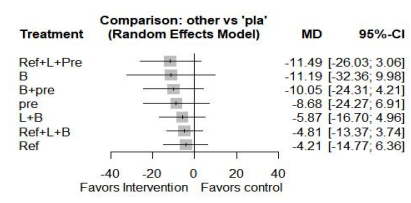

C

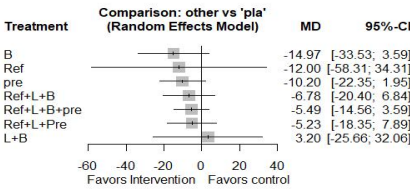

D

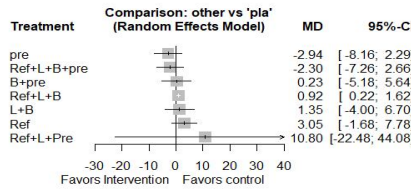

E

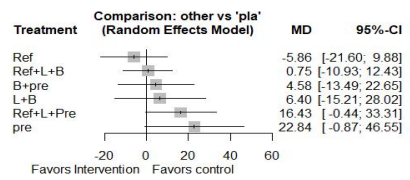

F

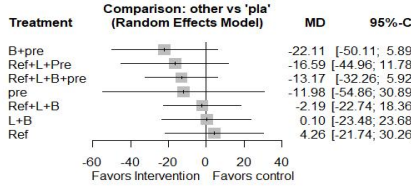

G

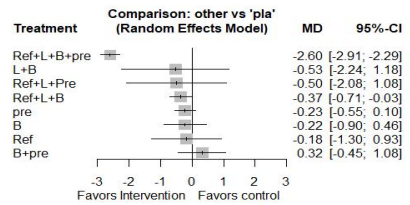

H

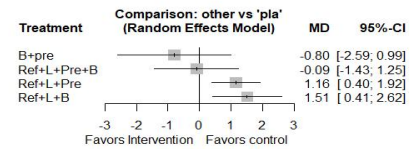

**Supplementary Figure S3.** Meta-analysis of different traditional probiotics either alone or combination for (A) alanine aminotransferase (ALT), (B) aspartate transaminase (AST), (C) gamma glutamyl transferase (GGT), (D) fasting blood glucose (FBG), (E) total cholesterol (TC), (F) triglycerides (TG), (G) body Mass Index (BMI) and (H) fibroscan CAP score. B: *Bifidobacterium*; L: *Lactobacillus*; Pla: control group; Pre: prebiotics; Ref: *Streptococcus thermophilus* and *Lactobacillus bulgaricus*.

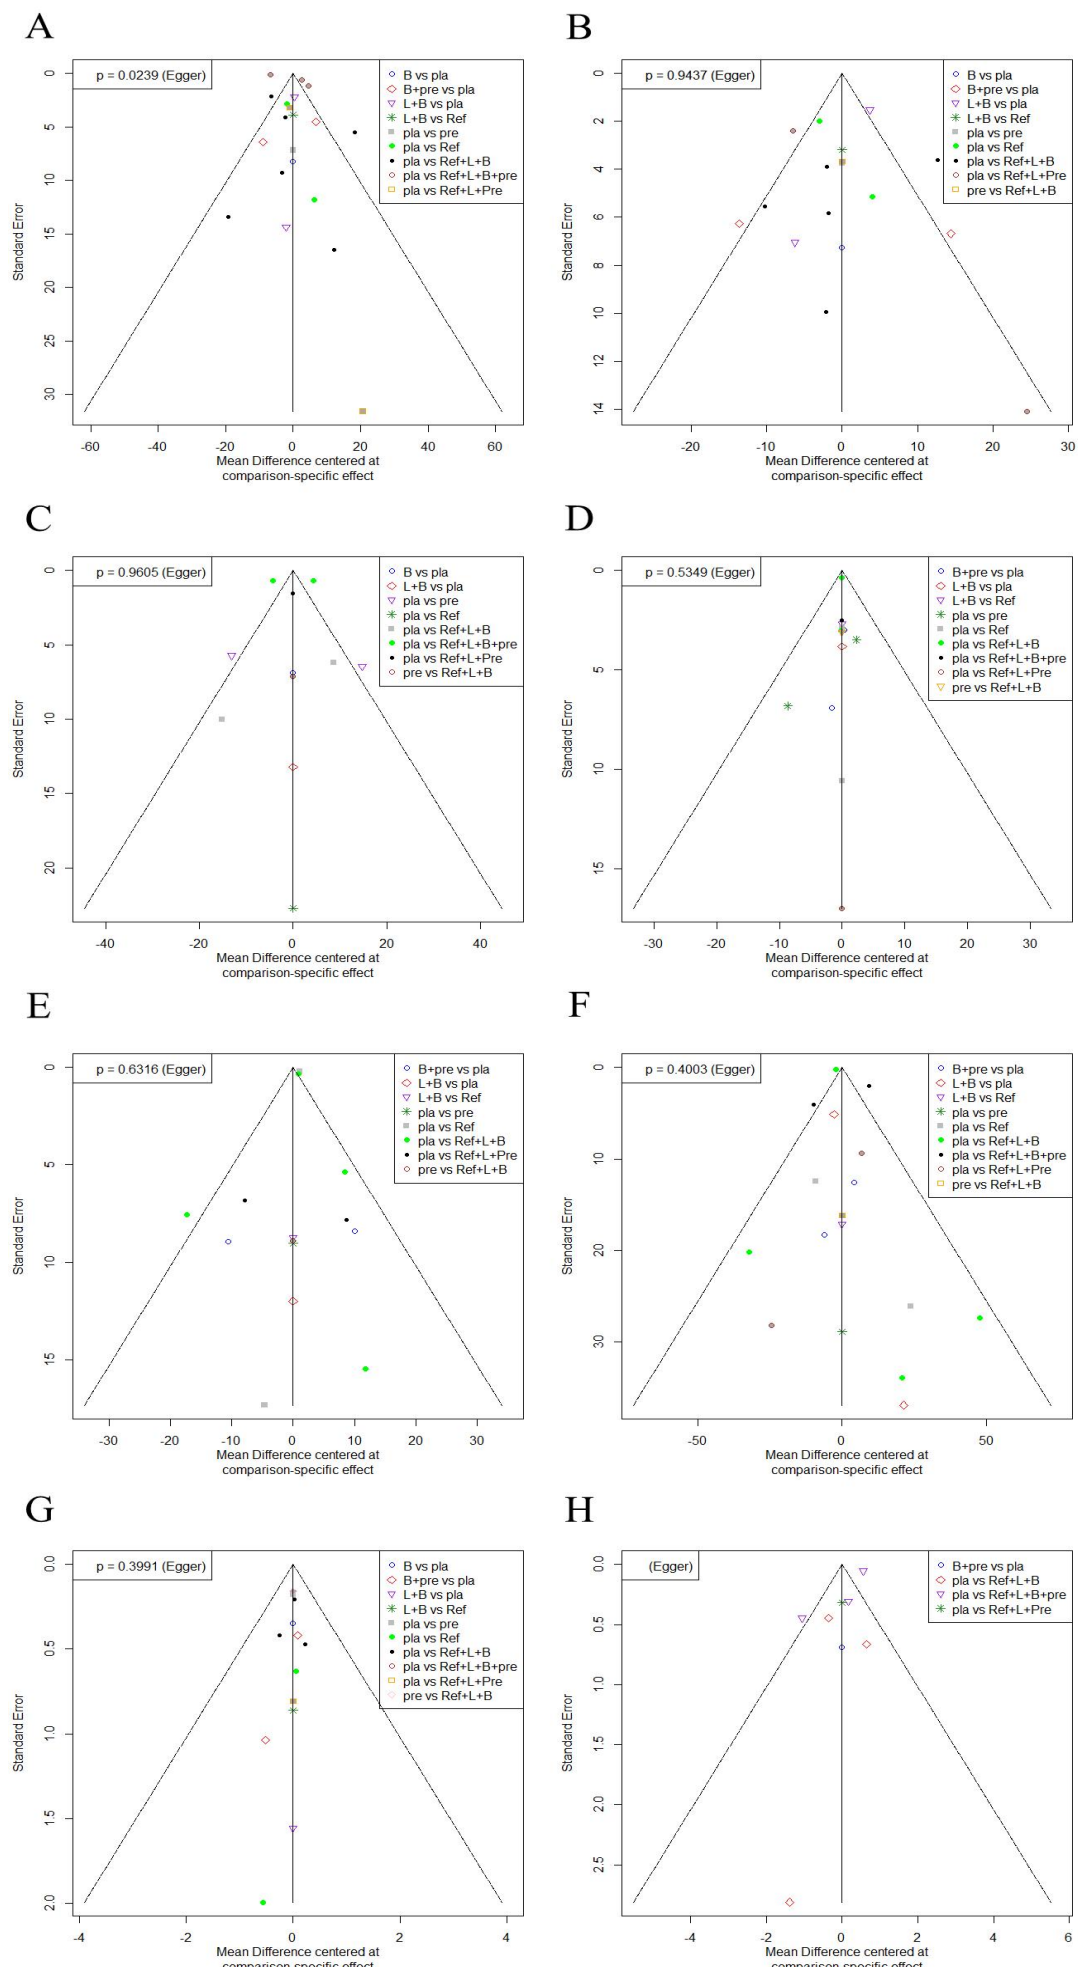

**Supplementary Figure S4.** Comparison-adjusted funnel plot of different probiotics comparison for (A) alanine aminotransferase (ALT), (B) aspartate transaminase (AST), (C) gamma glutamyl transferase (GGT), (D) fasting blood glucose (FBG), (E) total cholesterol (TC), (F) triglycerides (TG), (G) body Mass Index (BMI) and (H) fibroscan CAP score. A dot closer to the center line (at mean difference = 0) suggests that the study's effect size is close to the overall meta-analysis effect, implying agreement with the meta-analytic mean. B: *Bifidobacterium*; L: *Lactobacillus*; Pla: control group; Pre: prebiotics; Ref: *Streptococcus thermophilus* and *Lactobacillus bulgaricus*.

[illegible]

| C | B | I |  |  |  |  |  |  |  |  |  |  |  |  |  |  |  |  |  |  |  |  |  |  |  |  |  |  |  |  |  |  |  |  |  |  |  |  |  |  |  |  |  |  |  |  |  |  |  |  |  |  |  |  |  |  |  |  |  |  |  |  |  |  |  |  |  |  |  |  |  |  |  |  |  |  |  |  |  |  |  |  |  |  |  |  |  |  |  |  |  |  |  |  |  |  |  |  |  |  |  |  |  |  |  |  |  |  |  |  |  |  |  |  |  |  |  |  |  |  |  |  |  |  |  |  |  |  |  |  |  |  |  |  |  |  |  |  |  |  |  |  |  |  |  |  |  |  |  |  |  |  |  |  |  |  |  |  |  |  |  |  |  |  |  |  |  |  |  |  |  |  |  |  |  |  |  |  |  |  |  |  |  |  |  |  |  |  |  |  |  |  |  |  |  |  |  |  |  |  |  |  |  |  |  |  |  |  |  |  |  |  |  |  |  |  |  |  |  |  |  |  |  |  |  |  |  |  |  |  |  |  |  |  |  |  |  |  |  |  |  |  |  |  |  |  |  |  |  |  |  |  |  |  |  |  |  |  |  |  |  |  |  |  |  |  |  |  |  |  |  |  |  |  |  |  |  |  |  |  |  |  |  |  |  |  |  |  |  |  |  |  |  |  |  |  |  |  |  |  |  |  |  |  |  |  |  |  |  |  |  |  |  |  |  |  |  |  |  |  |  |  |  |  |  |  |  |  |  |  |  |  |  |  |  |  |  |  |  |  |  |  |  |  |  |  |  |  |  |  |  |  |  |  |  |  |  |  |  |  |  |  |  |  |  |  |  |  |  |  |  |  |  |  |  |  |  |  |  |  |  |  |  |  |  |  |  |  |  |  |  |  |  |  |  |  |  |  |  |  |  |  |  |  |  |  |  |  |  |  |  |  |  |  |  |  |  |  |  |  |  |  |  |  |  |  |  |  |  |  |  |  |  |  |  |  |  |  |  |  |  |  |  |  |  |  |  |  |  |  |  |  |  |  |  |  |  |  |  |  |  |  |  |  |  |  |  |  |  |  |  |  |  |  |  |  |  |  |  |  |  |  |  |  |  |  |  |  |  |  |  |  |  |  |  |  |  |  |  |  |  |  |  |  |  |  |  |  |  |  |  |  |  |  |  |  |  |  |  |  |  |  |  |  |  |  |  |  |  |  |  |  |  |  |  |  |  |  |  |  |  |  |  |  |  |  |  |  |  |  |  |  |  |  |  |  |  |  |  |  |  |  |  |  |  |  |  |  |  |  |  |  |  |  |  |  |  |  |  |  |  |  |  |  |  |  |  |  |  |  |  |  |  |  |  |  |  |  |  |  |  |  |  |  |  |  |  |  |  |  |  |  |  |  |  |  |  |  |  |  |  |  |  |  |  |  |  |  |  |  |  |  |  |  |  |  |  |  |  |  |  |  |  |  |  |  |  |  |  |  |  |  |  |  |  |  |  |  |  |  |  |  |  |  |  |  |  |  |  |  |  |  |  |  |  |  |  |  |  |  |  |  |  |  |  |  |  |  |  |  |  |  |  |  |  |  |  |  |  |  |  |  |  |  |  |  |  |  |  |  |  |  |  |  |  |  |  |  |  |  |  |  |  |  |  |  |  |  |  |  |  |  |  |  |  |  |  |  |  |  |  |  |  |  |  |  |  |  |  |  |  |  |  |  |  |  |  |  |  |  |  |  |  |  |  |  |  |  |  |  |  |  |  |  |  |  |  |  |  |  |  |  |  |  |  |  |  |  |  |  |  |  |  |  |  |  |  |  |  |  |  |  |  |  |  |  |  |  |  |  |  |  |  |  |  |  |  |  |  |  |  |  |  |  |  |  |  |  |  |  |  |  |  |  |  |  |  |  |  |  |  |  |  |  |  |  |  |  |  |  |  |  |  |  |  |  |  |  |  |  |  |  |  |  |  |  |  |  |  |  |  |  |  |  |  |  |  |  |  |  |  |  |  |  |  |  |  |  |  |  |  |  |  |  |  |  |  |  |  |  |  |  |  |  |  |  |  |  |  |  |  |  |  |  |  |  |  |  |  |  |  |  |  |  |  |  |  |  |  |  |  |  |  |  |  |  |  |  |  |  |  |  |  |  |  |  |  |  |  |  |  |  |  |  |  |  |  |  |  |  |  |  |  |  |  |  |  |  |  |  |  |  |  |  |  |  |  |  |  |  |  |  |  |  |  |  |  |  |  |  |  |  |  |  |  |  |  |  |  |  |  |  |  |  |  |  |  |  |  |  |  |  |  |  |  |  |  |  |  |  |  |  |  |  |  |  |  |  |  |  |  |  |  |  |  |  |  |  |  |  |  |  |  |  |  |  |  |  |  |  |  |  |  |  |  |  |  |  |  |  |  |  |  |  |  |  |  |  |  |  |  |  |  |  |  |  |  |  |  |  |  |  |  |  |  |  |  |  |  |  |  |  |  |  |  |  |  |  |  |  |  |  |  |  |  |  |  |  |  |  |  |  |  |  |  |  |  |  |  |  |  |  |  |  |  |  |  |  |  |  |  |  |  |  |  |  |  |  |  |  |  |  |  |  |  |  |  |  |  |  |  |  |  |  |  |  |  |  |  |  |  |  |  |  |  |  |  |  |  |  |  |  |  |  |  |  |  |  |  |  |  |  |  |  |  |  |  |  |  |  |  |  |  |  |  |  |  |  |  |  |  |  |  |  |  |  |  |  |  |  |  |  |  |  |  |  |  |  |  |  |  |  |  |  |  |  |  |  |  |  |  |  |  |  |  |  |  |  |  |  |  |  |  |  |  |  |  |  |  |  |  |  |  |  |  |  |  |  |  |  |  |  |  |  |  |  |  |  |  |  |  |  |  |  |  |  |  |  |  |  |  |  |  |  |  |  |  |  |  |  |  |  |  |  |  |  |  |  |  |  |  |  |  |  |  |  |  |  |  |  |  |  |  |  |  |  |  |  |  |  |  |  |  |  |  |  |  |  |  |  |  |  |  |  |  |  |  |  |  |  |  |  |  |  |  |  |  |  |  |  |  |  |  |  |  |  |  |  |  |  |  |  |  |  |
|---|---|---|--|--|--|--|--|--|--|--|--|--|--|--|--|--|--|--|--|--|--|--|--|--|--|--|--|--|--|--|--|--|--|--|--|--|--|--|--|--|--|--|--|--|--|--|--|--|--|--|--|--|--|--|--|--|--|--|--|--|--|--|--|--|--|--|--|--|--|--|--|--|--|--|--|--|--|--|--|--|--|--|--|--|--|--|--|--|--|--|--|--|--|--|--|--|--|--|--|--|--|--|--|--|--|--|--|--|--|--|--|--|--|--|--|--|--|--|--|--|--|--|--|--|--|--|--|--|--|--|--|--|--|--|--|--|--|--|--|--|--|--|--|--|--|--|--|--|--|--|--|--|--|--|--|--|--|--|--|--|--|--|--|--|--|--|--|--|--|--|--|--|--|--|--|--|--|--|--|--|--|--|--|--|--|--|--|--|--|--|--|--|--|--|--|--|--|--|--|--|--|--|--|--|--|--|--|--|--|--|--|--|--|--|--|--|--|--|--|--|--|--|--|--|--|--|--|--|--|--|--|--|--|--|--|--|--|--|--|--|--|--|--|--|--|--|--|--|--|--|--|--|--|--|--|--|--|--|--|--|--|--|--|--|--|--|--|--|--|--|--|--|--|--|--|--|--|--|--|--|--|--|--|--|--|--|--|--|--|--|--|--|--|--|--|--|--|--|--|--|--|--|--|--|--|--|--|--|--|--|--|--|--|--|--|--|--|--|--|--|--|--|--|--|--|--|--|--|--|--|--|--|--|--|--|--|--|--|--|--|--|--|--|--|--|--|--|--|--|--|--|--|--|--|--|--|--|--|--|--|--|--|--|--|--|--|--|--|--|--|--|--|--|--|--|--|--|--|--|--|--|--|--|--|--|--|--|--|--|--|--|--|--|--|--|--|--|--|--|--|--|--|--|--|--|--|--|--|--|--|--|--|--|--|--|--|--|--|--|--|--|--|--|--|--|--|--|--|--|--|--|--|--|--|--|--|--|--|--|--|--|--|--|--|--|--|--|--|--|--|--|--|--|--|--|--|--|--|--|--|--|--|--|--|--|--|--|--|--|--|--|--|--|--|--|--|--|--|--|--|--|--|--|--|--|--|--|--|--|--|--|--|--|--|--|--|--|--|--|--|--|--|--|--|--|--|--|--|--|--|--|--|--|--|--|--|--|--|--|--|--|--|--|--|--|--|--|--|--|--|--|--|--|--|--|--|--|--|--|--|--|--|--|--|--|--|--|--|--|--|--|--|--|--|--|--|--|--|--|--|--|--|--|--|--|--|--|--|--|--|--|--|--|--|--|--|--|--|--|--|--|--|--|--|--|--|--|--|--|--|--|--|--|--|--|--|--|--|--|--|--|--|--|--|--|--|--|--|--|--|--|--|--|--|--|--|--|--|--|--|--|--|--|--|--|--|--|--|--|--|--|--|--|--|--|--|--|--|--|--|--|--|--|--|--|--|--|--|--|--|--|--|--|--|--|--|--|--|--|--|--|--|--|--|--|--|--|--|--|--|--|--|--|--|--|--|--|--|--|--|--|--|--|--|--|--|--|--|--|--|--|--|--|--|--|--|--|--|--|--|--|--|--|--|--|--|--|--|--|--|--|--|--|--|--|--|--|--|--|--|--|--|--|--|--|--|--|--|--|--|--|--|--|--|--|--|--|--|--|--|--|--|--|--|--|--|--|--|--|--|--|--|--|--|--|--|--|--|--|--|--|--|--|--|--|--|--|--|--|--|--|--|--|--|--|--|--|--|--|--|--|--|--|--|--|--|--|--|--|--|--|--|--|--|--|--|--|--|--|--|--|--|--|--|--|--|--|--|--|--|--|--|--|--|--|--|--|--|--|--|--|--|--|--|--|--|--|--|--|--|--|--|--|--|--|--|--|--|--|--|--|--|--|--|--|--|--|--|--|--|--|--|--|--|--|--|--|--|--|--|--|--|--|--|--|--|--|--|--|--|--|--|--|--|--|--|--|--|--|--|--|--|--|--|--|--|--|--|--|--|--|--|--|--|--|--|--|--|--|--|--|--|--|--|--|--|--|--|--|--|--|--|--|--|--|--|--|--|--|--|--|--|--|--|--|--|--|--|--|--|--|--|--|--|--|--|--|--|--|--|--|--|--|--|--|--|--|--|--|--|--|--|--|--|--|--|--|--|--|--|--|--|--|--|--|--|--|--|--|--|--|--|--|--|--|--|--|--|--|--|--|--|--|--|--|--|--|--|--|--|--|--|--|--|--|--|--|--|--|--|--|--|--|--|--|--|--|--|--|--|--|--|--|--|--|--|--|--|--|--|--|--|--|--|--|--|--|--|--|--|--|--|--|--|--|--|--|--|--|--|--|--|--|--|--|--|--|--|--|--|--|--|--|--|--|--|--|--|--|--|--|--|--|--|--|--|--|--|--|--|--|--|--|--|--|--|--|--|--|--|--|--|--|--|--|--|--|--|--|--|--|--|--|--|--|--|--|--|--|--|--|--|--|--|--|--|--|--|--|--|--|--|--|--|--|--|--|--|--|--|--|--|--|--|--|--|--|--|--|--|--|--|--|--|--|--|--|--|--|--|--|--|--|--|--|--|--|--|--|--|--|--|--|--|--|--|--|--|--|--|--|--|--|--|--|--|--|--|--|--|--|--|--|--|--|--|--|--|--|--|--|--|--|--|--|--|--|--|--|--|--|--|--|--|--|--|--|--|--|--|--|--|--|--|--|--|--|--|--|--|--|--|--|--|--|--|--|--|--|--|--|--|--|--|--|--|--|--|--|--|--|--|--|--|--|--|--|--|--|--|--|--|--|--|--|--|--|--|--|--|--|--|--|--|--|--|--|--|--|--|--|--|--|--|--|--|--|--|--|--|--|--|--|--|--|--|--|--|--|--|--|--|--|--|--|--|--|--|--|--|--|--|--|--|--|--|--|--|--|--|--|--|--|--|--|--|--|--|--|--|--|--|--|--|--|--|--|--|--|--|--|--|--|--|--|--|--|--|--|--|--|--|--|--|--|--|--|--|--|--|--|--|--|--|--|--|--|--|--|--|--|--|--|--|--|--|--|--|--|--|--|--|--|--|
|---|---|---|--|--|--|--|--|--|--|--|--|--|--|--|--|--|--|--|--|--|--|--|--|--|--|--|--|--|--|--|--|--|--|--|--|--|--|--|--|--|--|--|--|--|--|--|--|--|--|--|--|--|--|--|--|--|--|--|--|--|--|--|--|--|--|--|--|--|--|--|--|--|--|--|--|--|--|--|--|--|--|--|--|--|--|--|--|--|--|--|--|--|--|--|--|--|--|--|--|--|--|--|--|--|--|--|--|--|--|--|--|--|--|--|--|--|--|--|--|--|--|--|--|--|--|--|--|--|--|--|--|--|--|--|--|--|--|--|--|--|--|--|--|--|--|--|--|--|--|--|--|--|--|--|--|--|--|--|--|--|--|--|--|--|--|--|--|--|--|--|--|--|--|--|--|--|--|--|--|--|--|--|--|--|--|--|--|--|--|--|--|--|--|--|--|--|--|--|--|--|--|--|--|--|--|--|--|--|--|--|--|--|--|--|--|--|--|--|--|--|--|--|--|--|--|--|--|--|--|--|--|--|--|--|--|--|--|--|--|--|--|--|--|--|--|--|--|--|--|--|--|--|--|--|--|--|--|--|--|--|--|--|--|--|--|--|--|--|--|--|--|--|--|--|--|--|--|--|--|--|--|--|--|--|--|--|--|--|--|--|--|--|--|--|--|--|--|--|--|--|--|--|--|--|--|--|--|--|--|--|--|--|--|--|--|--|--|--|--|--|--|--|--|--|--|--|--|--|--|--|--|--|--|--|--|--|--|--|--|--|--|--|--|--|--|--|--|--|--|--|--|--|--|--|--|--|--|--|--|--|--|--|--|--|--|--|--|--|--|--|--|--|--|--|--|--|--|--|--|--|--|--|--|--|--|--|--|--|--|--|--|--|--|--|--|--|--|--|--|--|--|--|--|--|--|--|--|--|--|--|--|--|--|--|--|--|--|--|--|--|--|--|--|--|--|--|--|--|--|--|--|--|--|--|--|--|--|--|--|--|--|--|--|--|--|--|--|--|--|--|--|--|--|--|--|--|--|--|--|--|--|--|--|--|--|--|--|--|--|--|--|--|--|--|--|--|--|--|--|--|--|--|--|--|--|--|--|--|--|--|--|--|--|--|--|--|--|--|--|--|--|--|--|--|--|--|--|--|--|--|--|--|--|--|--|--|--|--|--|--|--|--|--|--|--|--|--|--|--|--|--|--|--|--|--|--|--|--|--|--|--|--|--|--|--|--|--|--|--|--|--|--|--|--|--|--|--|--|--|--|--|--|--|--|--|--|--|--|--|--|--|--|--|--|--|--|--|--|--|--|--|--|--|--|--|--|--|--|--|--|--|--|--|--|--|--|--|--|--|--|--|--|--|--|--|--|--|--|--|--|--|--|--|--|--|--|--|--|--|--|--|--|--|--|--|--|--|--|--|--|--|--|--|--|--|--|--|--|--|--|--|--|--|--|--|--|--|--|--|--|--|--|--|--|--|--|--|--|--|--|--|--|--|--|--|--|--|--|--|--|--|--|--|--|--|--|--|--|--|--|--|--|--|--|--|--|--|--|--|--|--|--|--|--|--|--|--|--|--|--|--|--|--|--|--|--|--|--|--|--|--|--|--|--|--|--|--|--|--|--|--|--|--|--|--|--|--|--|--|--|--|--|--|--|--|--|--|--|--|--|--|--|--|--|--|--|--|--|--|--|--|--|--|--|--|--|--|--|--|--|--|--|--|--|--|--|--|--|--|--|--|--|--|--|--|--|--|--|--|--|--|--|--|--|--|--|--|--|--|--|--|--|--|--|--|--|--|--|--|--|--|--|--|--|--|--|--|--|--|--|--|--|--|--|--|--|--|--|--|--|--|--|--|--|--|--|--|--|--|--|--|--|--|--|--|--|--|--|--|--|--|--|--|--|--|--|--|--|--|--|--|--|--|--|--|--|--|--|--|--|--|--|--|--|--|--|--|--|--|--|--|--|--|--|--|--|--|--|--|--|--|--|--|--|--|--|--|--|--|--|--|--|--|--|--|--|--|--|--|--|--|--|--|--|--|--|--|--|--|--|--|--|--|--|--|--|--|--|--|--|--|--|--|--|--|--|--|--|--|--|--|--|--|--|--|--|--|--|--|--|--|--|--|--|--|--|--|--|--|--|--|--|--|--|--|--|--|--|--|--|--|--|--|--|--|--|--|--|--|--|--|--|--|--|--|--|--|--|--|--|--|--|--|--|--|--|--|--|--|--|--|--|--|--|--|--|--|--|--|--|--|--|--|--|--|--|--|--|--|--|--|--|--|--|--|--|--|--|--|--|--|--|--|--|--|--|--|--|--|--|--|--|--|--|--|--|--|--|--|--|--|--|--|--|--|--|--|--|--|--|--|--|--|--|--|--|--|--|--|--|--|--|--|--|--|--|--|--|--|--|--|--|--|--|--|--|--|--|--|--|--|--|--|--|--|--|--|--|--|--|--|--|--|--|--|--|--|--|--|--|--|--|--|--|--|--|--|--|--|--|--|--|--|--|--|--|--|--|--|--|--|--|--|--|--|--|--|--|--|--|--|--|--|--|--|--|--|--|--|--|--|--|--|--|--|--|--|--|--|--|--|--|--|--|--|--|--|--|--|--|--|--|--|--|--|--|--|--|--|--|--|--|--|--|--|--|--|--|--|--|--|--|--|--|--|--|--|--|--|--|--|--|--|--|--|--|--|--|--|--|--|--|--|--|--|--|--|--|--|--|--|--|--|--|--|--|--|--|--|--|--|--|--|--|--|--|--|--|--|--|--|--|--|--|--|--|--|--|--|--|--|--|--|--|--|--|--|--|--|--|--|--|--|--|--|--|--|--|--|--|--|--|--|--|--|--|--|--|--|--|--|--|--|--|--|--|--|--|--|--|--|--|--|--|--|--|--|--|--|--|--|--|--|--|--|--|--|--|--|--|--|--|--|--|--|--|--|--|--|--|--|--|--|--|--|--|--|--|--|--|--|--|--|--|--|--|--|--|--|--|--|--|--|--|--|--|--|--|--|--|--|--|--|--|--|--|--|--|--|--|--|--|--|--|--|--|--|--|--|--|--|--|--|--|

[illegible][illegible][illegible][illegible][illegible][illegible]

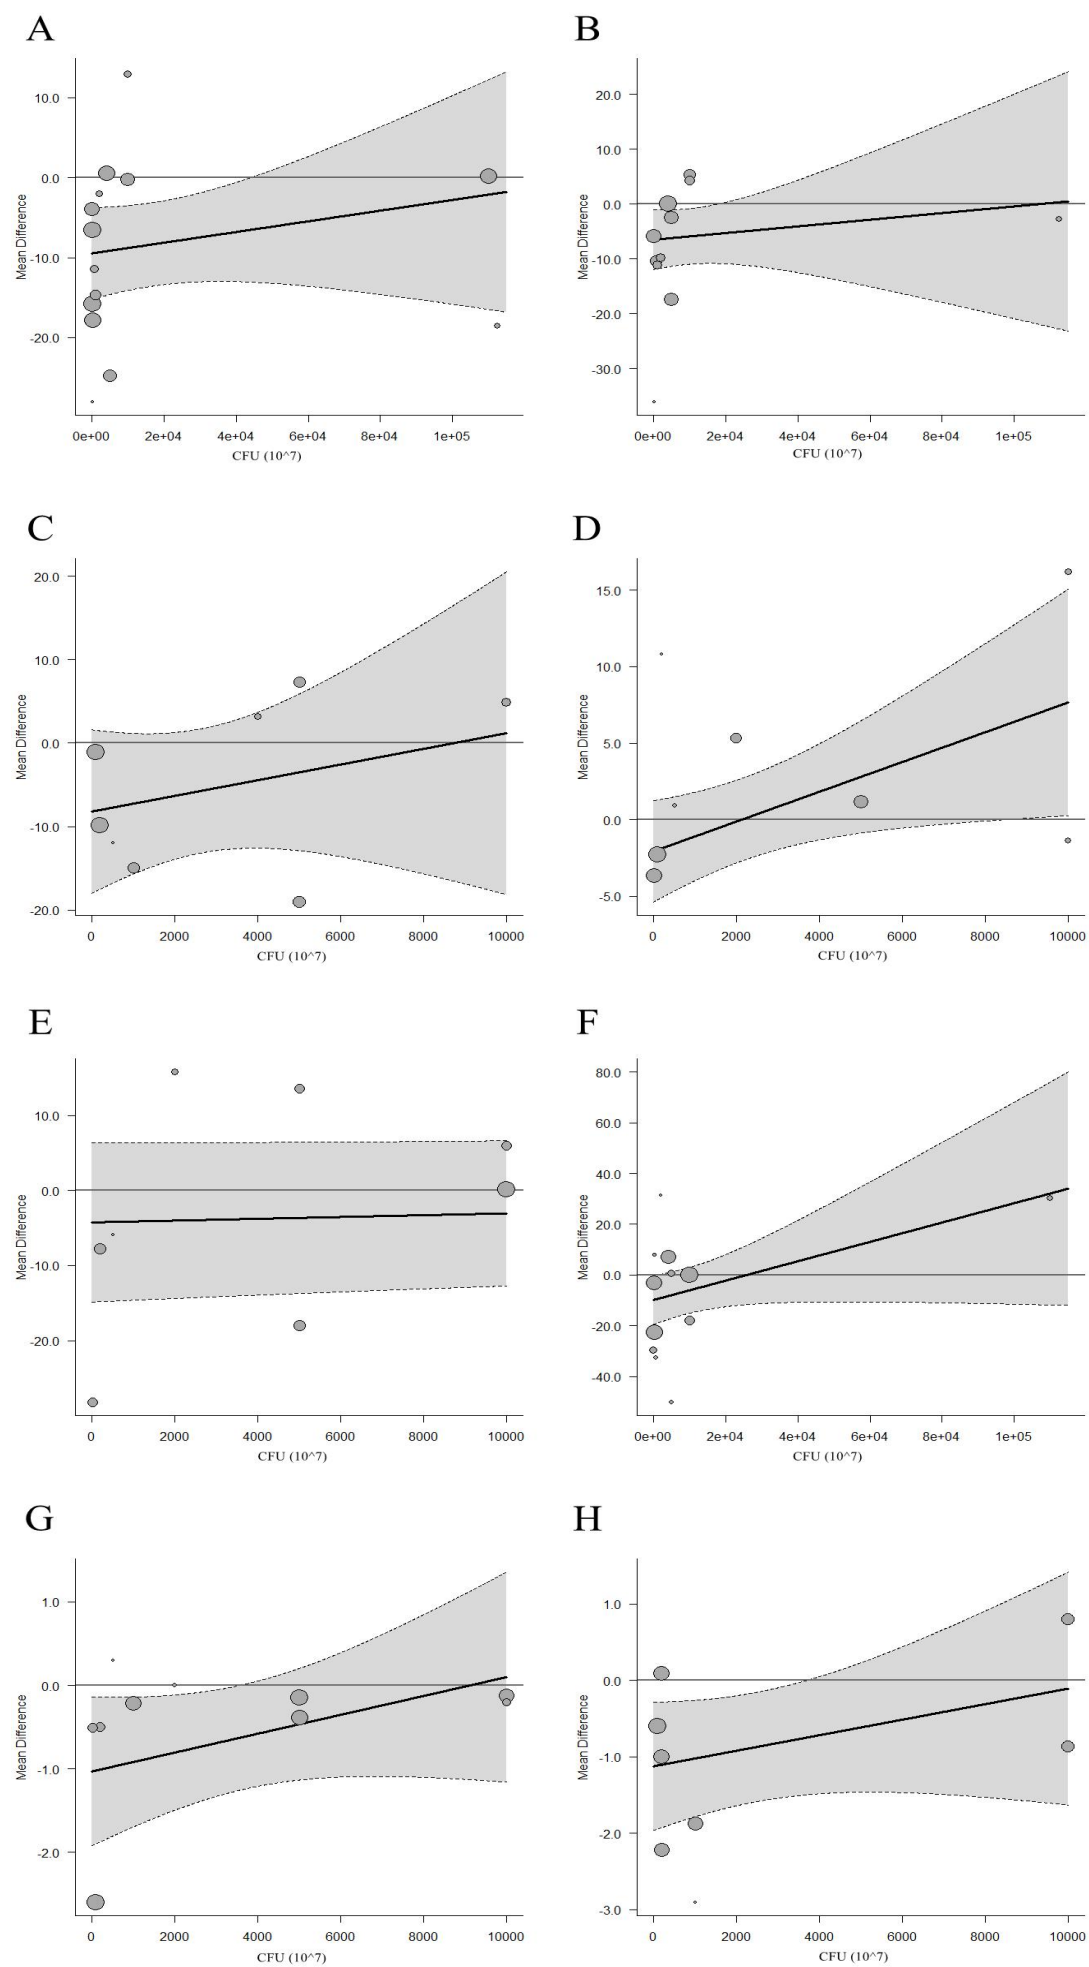

**Supplementary Figure S6.** Meta-regression analysis of CFU and mean difference of (A) alanine aminotransferase (ALT), (B) aspartate transaminase (AST), (C) gamma glutamyl transferase (GGT), (D) fasting blood glucose (FBG), (E) total cholesterol (TC), (F) triglycerides (TG), (G) body Mass Index (BMI) and (H) fibroscan CAP score. Circles mean the studies included in the analysis. The change in mean and 95% CI are represented by the solid and dotted lines, respectively. CFU: Colony Forming Units.



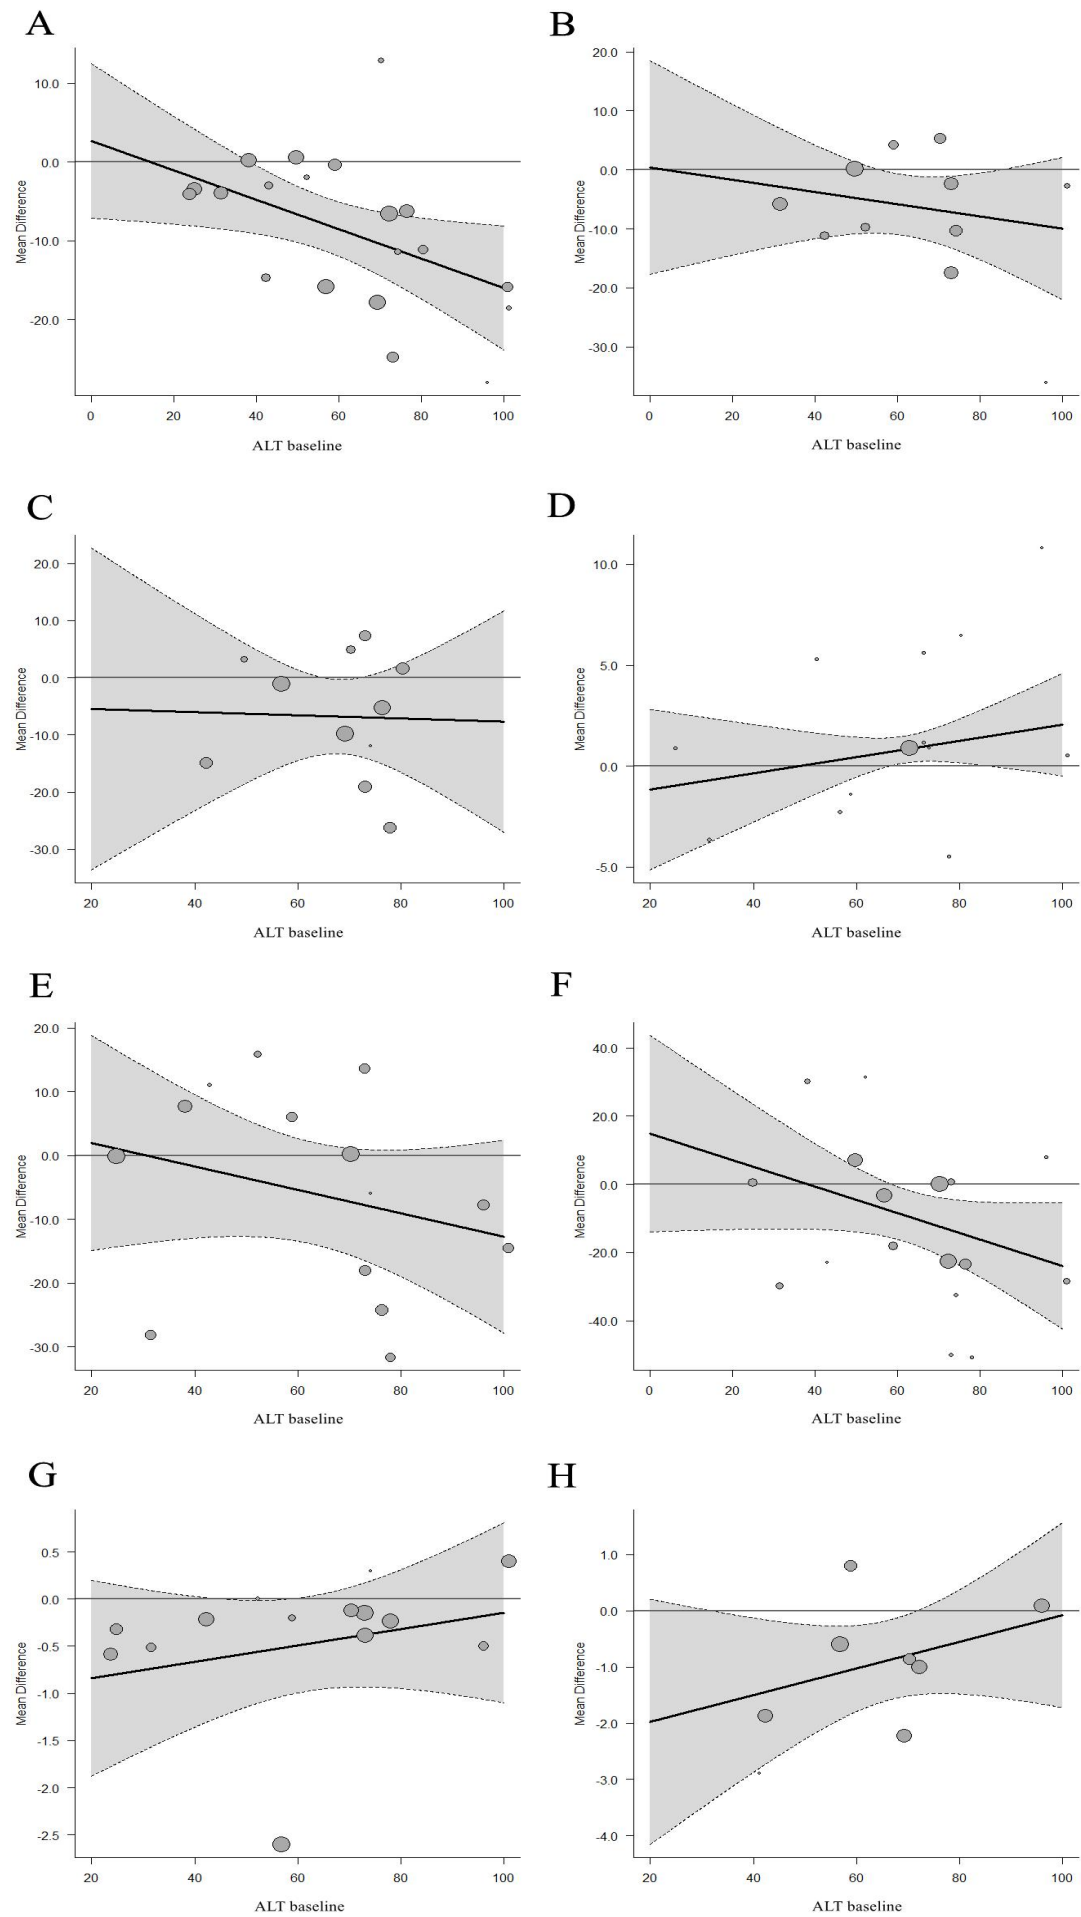

**Supplementary Figure S7.** Meta-regression analysis of the effect of ALT baseline on (A) alanine aminotransferase (ALT), (B) aspartate transaminase (AST), (C) gamma glutamyl transferase (GGT), (D) fasting blood glucose (FBG), (E) total cholesterol (TC), (F) triglycerides (TG), (G) body Mass Index (BMI) and (H) fibroscan CAP score. Circles mean the studies included in the analysis. The change in mean and 95% CI are represented by the solid and dotted lines, respectively.

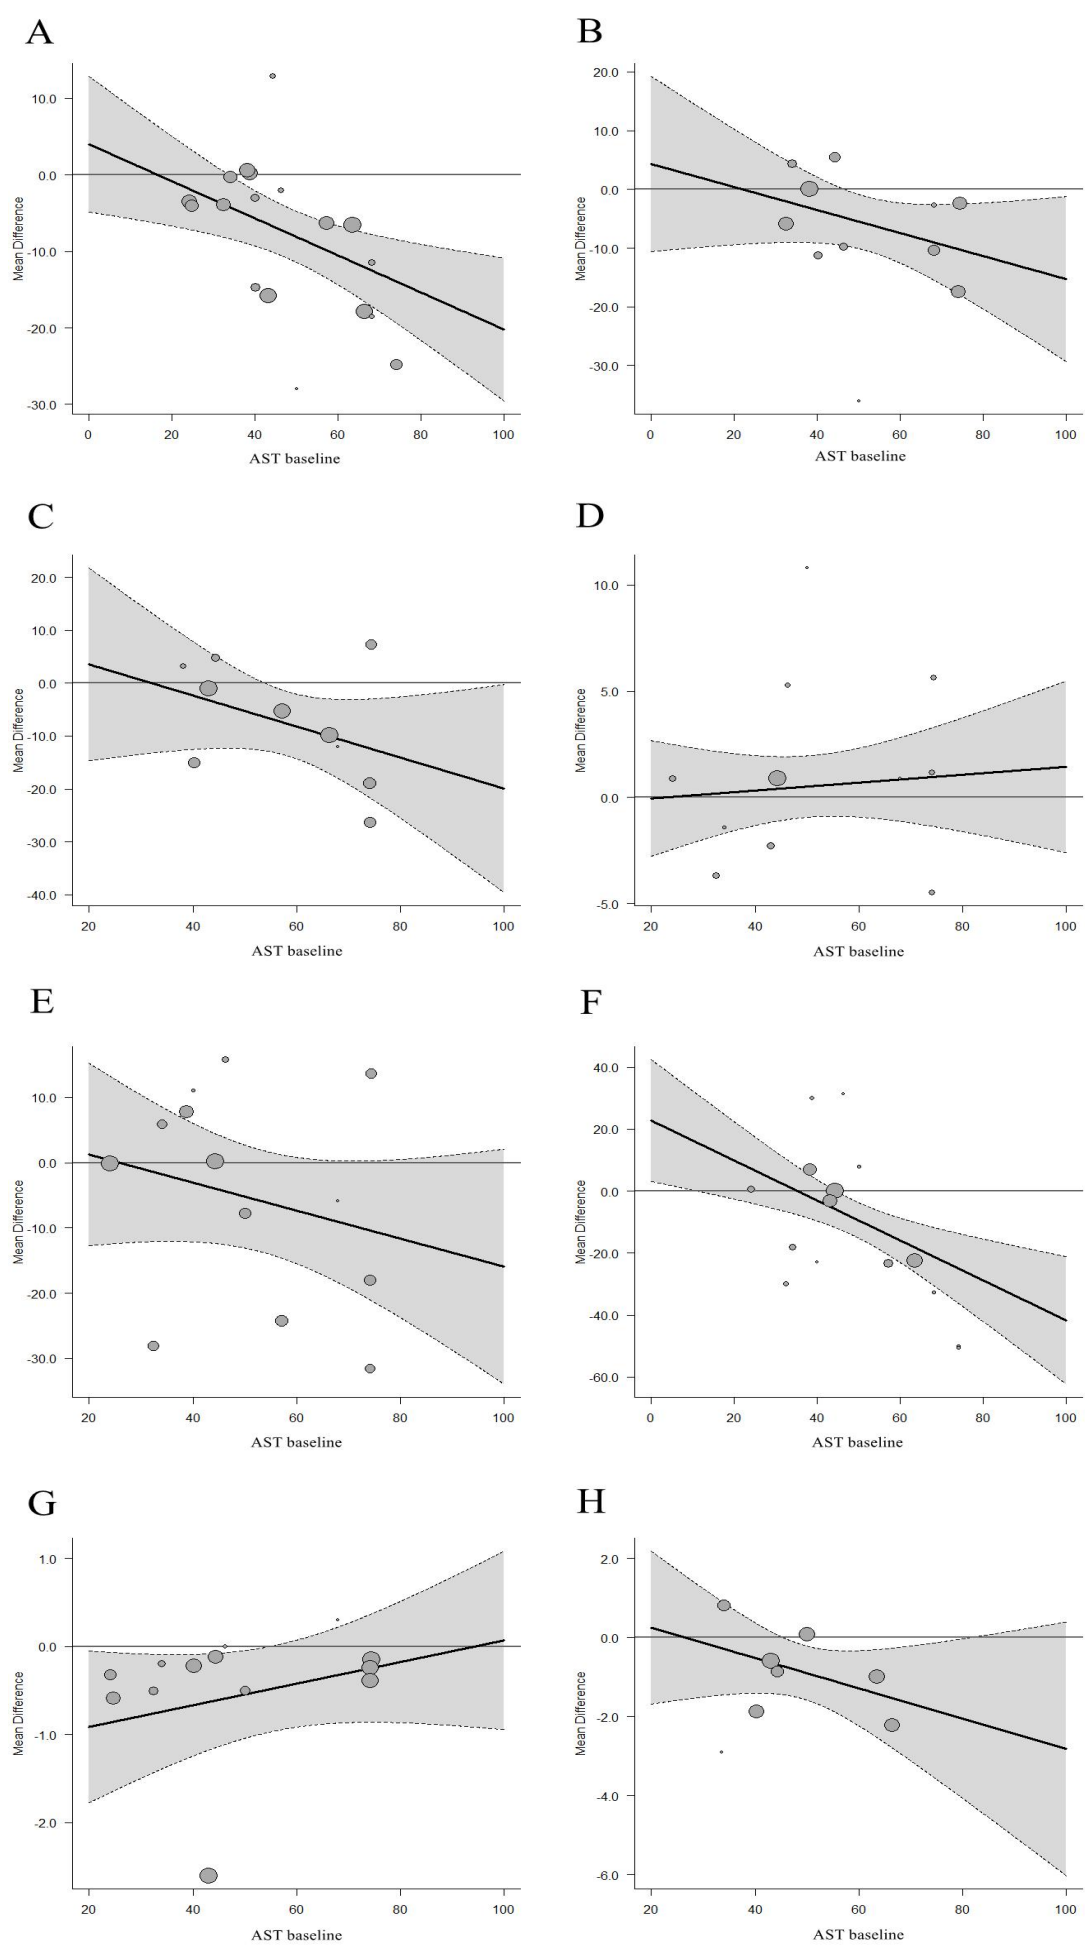

**Supplementary Figure S8.** Meta-regression analysis of the effect of AST baseline on (A) alanine aminotransferase (ALT), (B) aspartate transaminase (AST), (C) gamma glutamyl transferase (GGT), (D) fasting blood glucose (FBG), (E) total cholesterol (TC), (F) triglycerides (TG), (G) body Mass Index (BMI) and (H) fibroscan CAP score. Circles mean the studies included in the analysis. The change in mean and 95% CI are represented by the solid and dotted lines, respectively.



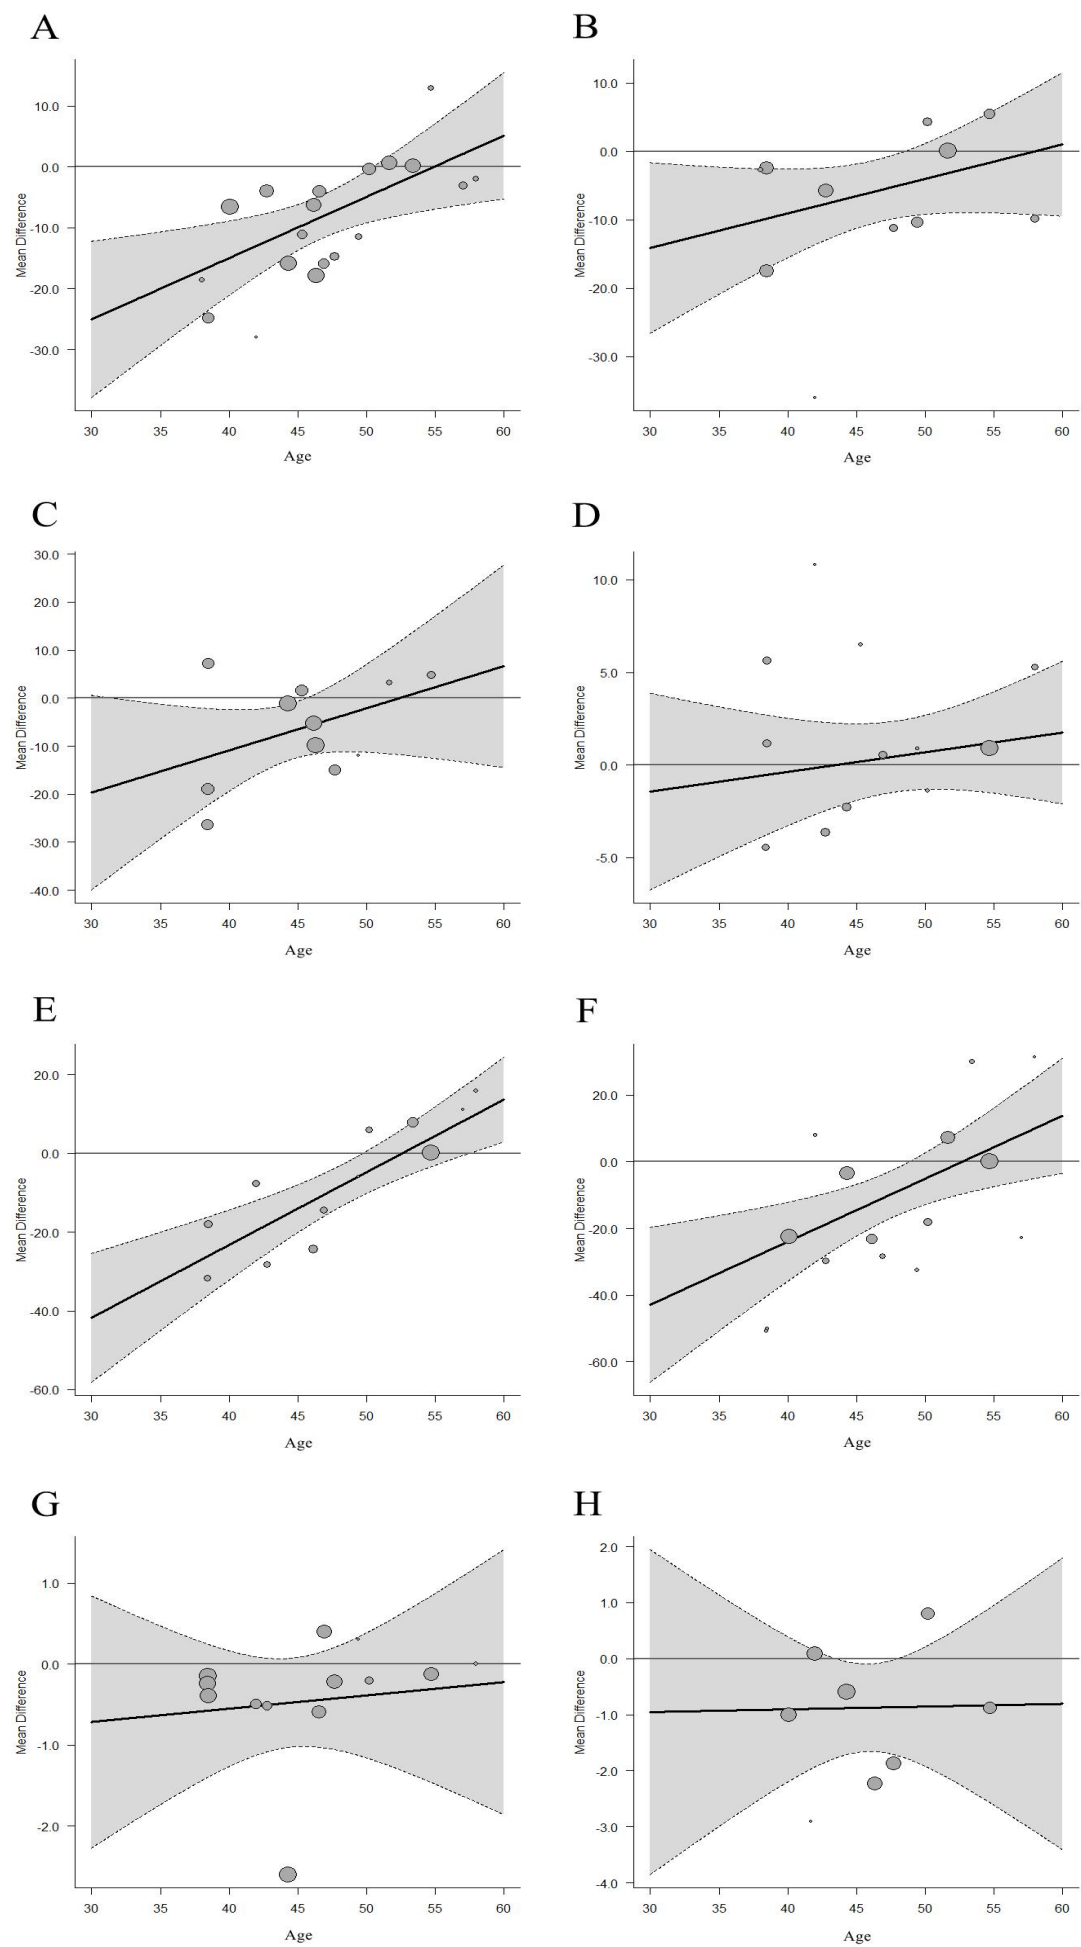

**Supplementary Figure S9.** Meta-regression analysis of the effect of Age on (A) alanine aminotransferase (ALT), (B) aspartate transaminase (AST), (C) gamma glutamyl transferase (GGT), (D) fasting blood glucose (FBG), (E) total cholesterol (TC), (F) triglycerides (TG), (G) body Mass Index (BMI) and (H) fibroscan CAP score. Circles mean the studies included in the analysis. The change in mean and 95% CI are represented by the solid and dotted lines, respectively.

A

| Study ID                | Experimental | Comparator | Outcome | Weight | D1 | D2 | D3 | D4 | D5 | Overall |  |               |
|-------------------------|--------------|------------|---------|--------|----|----|----|----|----|---------|--|---------------|
| Nabavi S 2014 Iran      | NA           | NA         | NA      | 1      |    |    |    |    |    |         |  | Low risk      |
| Eslampour T 2014 Iran   | NA           | NA         | NA      | 1      |    |    |    |    |    |         |  | Some concerns |
| Mofidi F 2016 Iran      | NA           | NA         | NA      | 1      |    |    |    |    |    |         |  | High risk     |
| Marshall E 2017 Ukraine | NA           | NA         | NA      | 1      |    |    |    |    |    |         |  |               |
| Kozubak N 2018 Ukraine  | NA           | NA         | NA      | 1      |    |    |    |    |    |         |  |               |
| Wong VW 2013 Hong Kong  | NA           | NA         | NA      | 1      |    |    |    |    |    |         |  |               |
| Cai GS 2020 China       | NA           | NA         | NA      | 1      |    |    |    |    |    |         |  |               |
| Escobar GS 2023 Brazil  | NA           | NA         | NA      | 1      |    |    |    |    |    |         |  |               |

D1: Randomisation process. D2: Deviations from the intended interventions. D3: Missing outcome data. D4: Measurement of the outcome. D5: Selection of the reported result.

B

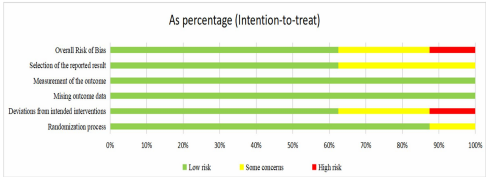

C

| Study ID                     | Experimental | Comparator | Outcome | Weight | D1 | D2 | D3 | D4 | D5 | Overall |  |               |
|------------------------------|--------------|------------|---------|--------|----|----|----|----|----|---------|--|---------------|
| Shawaf A 2013 Iran           | NA           | NA         | NA      | 1      |    |    |    |    |    |         |  | Low risk      |
| Sepideh A 2016 Iran          | NA           | NA         | NA      | 1      |    |    |    |    |    |         |  | Some concerns |
| Asgharian A 2016 Iran        | NA           | NA         | NA      | 1      |    |    |    |    |    |         |  | High risk     |
| Behrouz V 2020 Iran          | NA           | NA         | NA      | 1      |    |    |    |    |    |         |  |               |
| Abdani K 2020 Iran           | NA           | NA         | NA      | 1      |    |    |    |    |    |         |  |               |
| Bomhof MM 2019 Canada        | NA           | NA         | NA      | 1      |    |    |    |    |    |         |  |               |
| Scorletti E 2020 UK          | NA           | NA         | NA      | 1      |    |    |    |    |    |         |  |               |
| Chong PL 2021 UK             | NA           | NA         | NA      | 1      |    |    |    |    |    |         |  |               |
| Ahn SB 2019 Korea            | NA           | NA         | NA      | 1      |    |    |    |    |    |         |  |               |
| Mohamed Nor MA 2021 Malaysia | NA           | NA         | NA      | 1      |    |    |    |    |    |         |  |               |
| Chen Y 2019 China            | NA           | NA         | NA      | 1      |    |    |    |    |    |         |  |               |
| Malaguerma M 2012 Italy      | NA           | NA         | NA      | 1      |    |    |    |    |    |         |  |               |
| Aller 2011 Spain             | NA           | NA         | NA      | 1      |    |    |    |    |    |         |  |               |
| Durga A 2019 India           | NA           | NA         | NA      | 1      |    |    |    |    |    |         |  |               |
| Barcelos STA 2023 Brazil     | NA           | NA         | NA      | 1      |    |    |    |    |    |         |  |               |
| Crosman S 2022 Germany       | NA           | NA         | NA      | 1      |    |    |    |    |    |         |  |               |
| Sajani S 2016 Iran           | NA           | NA         | NA      | 1      |    |    |    |    |    |         |  |               |
| Zhu W 2022 China             | NA           | NA         | NA      | 1      |    |    |    |    |    |         |  |               |

D1: Randomisation process. D2: Deviations from the intended interventions. D3: Missing outcome data. D4: Measurement of the outcome. D5: Selection of the reported result.

D

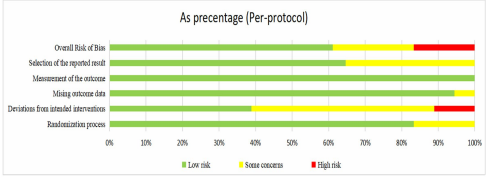

F

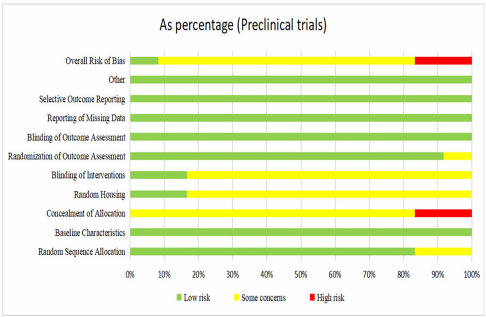

E

| Study ID                      | Experimental | Comparator | Outcome | Weight | D1 | D2 | D3 | D4 | D5 | D6 | D7 | D8 | D9 | D10 | Overall |  |               |
|-------------------------------|--------------|------------|---------|--------|----|----|----|----|----|----|----|----|----|-----|---------|--|---------------|
| Zhou S 2017 China             | NA           | NA         | NA      | 1      |    |    |    |    |    |    |    |    |    |     |         |  | Low risk      |
| Kulak SA 2021 Iran            | NA           | NA         | NA      | 1      |    |    |    |    |    |    |    |    |    |     |         |  | Some concerns |
| Kulak SA 2021 Iran            | NA           | NA         | NA      | 1      |    |    |    |    |    |    |    |    |    |     |         |  | High risk     |
| Varg T 2020 China             | NA           | NA         | NA      | 1      |    |    |    |    |    |    |    |    |    |     |         |  |               |
| Hu H 2020 China               | NA           | NA         | NA      | 1      |    |    |    |    |    |    |    |    |    |     |         |  |               |
| Li T 2022 China               | NA           | NA         | NA      | 1      |    |    |    |    |    |    |    |    |    |     |         |  |               |
| Han T 2020 China              | NA           | NA         | NA      | 1      |    |    |    |    |    |    |    |    |    |     |         |  |               |
| Wang Y 2020 Korea             | NA           | NA         | NA      | 1      |    |    |    |    |    |    |    |    |    |     |         |  |               |
| Wang Y 2020 Korea             | NA           | NA         | NA      | 1      |    |    |    |    |    |    |    |    |    |     |         |  |               |
| Lim S 2020                    | NA           | NA         | NA      | 1      |    |    |    |    |    |    |    |    |    |     |         |  |               |
| James Fernandez RP 2021 Spain | NA           | NA         | NA      | 1      |    |    |    |    |    |    |    |    |    |     |         |  |               |
| Shin W 2021 Korea             | NA           | NA         | NA      | 1      |    |    |    |    |    |    |    |    |    |     |         |  |               |

D1: Random Sequence Allocation. D2: Baseline Characteristics. D3: Consentment of Allocation. D4: Random Housing. D5: Blinding of Interventions. D6: Randomization of Outcome Assessment. D7: Blinding of Outcome Assessment. D8: Reporting of Missing Data. D9: Selective Outcome Reporting. D10: Other.

**Supplementary Figure S10.** Risk of bias analysis was performed on the 38 included research studies with the ROB 2 tool and SYRCLE ROB tool. The low risk of bias is presented in green, some concerns is presented in yellow, and the high risk of bias is presented in red. A. risk of bias summary tables for Intention-to-Treat studies. B. risk of bias as a percentage for Intention-to-Treat studies. C. Risk of bias summary tables for Per-Protocol studies. D. risk of bias as a percentage for Per-Protocol studies. E. Risk of bias summary tables for preclinical trials. F. risk of bias as a percentage for preclinical trials.
