# Supplementary material for: Roles of Traditional and Next-Generation Probiotics on Non-Alcoholic Fatty Liver Disease (NAFLD) and Non-Alcoholic Steatohepatitis (NASH): A Systematic Review and Network Meta-Analysis
Source: MDPI journal article supplement (doi:10.3390/antiox13030329), 2024-03-07
Supplement: s1 [file s1]

Supplementary Table S1 Baseline characteristics of the included clinical studies

| Reference           | Country   | Study population            | No. of participants who completed study | Study design                                                           | Probiotic/Synbiotic                                                                                                                                                                                                                                                                                                                  | Dose                          | Duration (W) | Post-intervention outcomes                                                                                                           | Study objective                                                                                                                                                                                                                                                                                     |
|---------------------|-----------|-----------------------------|-----------------------------------------|------------------------------------------------------------------------|--------------------------------------------------------------------------------------------------------------------------------------------------------------------------------------------------------------------------------------------------------------------------------------------------------------------------------------|-------------------------------|--------------|--------------------------------------------------------------------------------------------------------------------------------------|-----------------------------------------------------------------------------------------------------------------------------------------------------------------------------------------------------------------------------------------------------------------------------------------------------|
| Shavakhi A 2013     | Iran      | Men and women (18-75 years) | 63                                      | Double-blind, randomized, placebo-controlled crossover study           | <i>L. acidophilus</i> (10 million), <i>L. casei</i> (50 million), <i>L. rhamnosus</i> (7.5 million), <i>L. bulgaricus</i> (15 million) , <i>B. breve</i> (5 million), <i>B. longum</i> (2.5 million), <i>S. thermophilus</i> (5 million), fructooligosaccharides 350mg. Control: protein similarities                                | 2 tablets/day                 | 24           | AST↓, TC↓, TG→, BMI→, FBS→                                                                                                           | Probiotic combination with Metformin improves liver aminotransferases better than metformin alone in patients with NASH.                                                                                                                                                                            |
| Nabavi S 2014       | Iran      | Men and women (23-63 years) | 72                                      | Double-blind, randomized, placebo-controlled crossover study           | Probiotic yogurts: <i>L. acidophilus</i> La5 (4.42 million), <i>B. lactis</i> Bb12 (3.85million). Control yogurts: <i>L. bulgaricus</i> (2.39million), <i>S. thermophilus</i> (2.08 million)                                                                                                                                         | 300g/day                      | 8            | ALT↓, AST↓, TC↓, TG↓, LDL-C↓, HDL-C→                                                                                                 | Probiotic yogurt consumption improved hepatic enzymes, serum total cholesterol, and low-density lipoprotein cholesterol levels in studied subjects and might be useful in the management of NAFLD risk factors.                                                                                     |
| Eslamparast T 2014  | Iran      | Men and women (18-55 years) | 52                                      | Double-blind, randomized, placebo-controlled crossover study           | Total (200 million): <i>L. casei</i> , <i>L. rhamnosus</i> , <i>S. thermophilus</i> , <i>B. breve</i> , <i>L. acidophilus</i> , <i>B. longum</i> , <i>L. bulgaricus</i> , fructooli-gosaccharide. Control: maltodextrin                                                                                                              | 2*109 CFU of each capsule/day | 28           | ALT↓, AST↓, GGT↓, CRP↓, TNF-α↓, NF-κB p65↓, Fibroscan CAP score↓                                                                     | Synbiotic supplementation in addition to lifestyle modification is superior to lifestyle modification alone for the treatment of NAFLD, at least partially through attenuation of inflammatory markers in the body.                                                                                 |
| Sepideh A 2016      | Iran      | Men and women (18-75 years) | 42                                      | Double-blind, randomized, placebo-controlled crossover study           | <i>L. casei</i> (3000 million), <i>L. acidophilus</i> (30000 million), <i>L. rhamnosus</i> (7000 million), <i>L. bulgaricus</i> (500 million), <i>B. breve</i> (20000 million), <i>B. longum</i> (1000 million), <i>S. thermophilus</i> (300 million). Control: maltodextrin, lactose, and magnesium stearate                        | 1g of capsule/day             | 8            | FBG↓, Insulin↓, HOMA-IR↓, IL-6↓, TNF-α↓, HbA1C↓                                                                                      | The effects of probiotic supplementation on the reduction of glycemic and inflammatory indices in patients with NAFLD.                                                                                                                                                                              |
| Asgharian A 2016    | Iran      | Men and women (18-60 years) | 74                                      | Double-blind, randomized, placebo-controlled crossover study           | <i>L. casei</i> (NS), <i>L. acidophilus</i> (NS), <i>L. rhamnosus</i> (NS), <i>L. bulgaricus</i> (NS), <i>B. breve</i> (NS), <i>B. longum</i> (NS), <i>S. thermophilus</i> (NS). Control: starch                                                                                                                                     | 500mg of each capsule/day     | 8            | ALT→, AST→, CRP→                                                                                                                     | Symbiotic supplementation improved steatosis in NAFLD patients.                                                                                                                                                                                                                                     |
| Mofidi F 2018       | Iran      | Men and women (≥18 years)   | 50                                      | Double-blind, randomized, placebo-controlled crossover study           | Total (200 million): <i>L. casei</i> , <i>L. rhamnosus</i> , <i>S. thermophilus</i> , <i>B. breve</i> , <i>L. acidophilus</i> , <i>B. longum</i> , <i>L. bulgaricus</i> , fructo-oligosaccharide 125mg, magnesium stearate. Control: maltodextrin                                                                                    | 2 tablets/day                 | 28           | TG↓, LDL-C↓, TG↓, CRP↓, HDL-C→, TNF-α→, NF-κB p65↓, FBS→, Insulin→, HOMA-IR→, QUICKI→, Fibroscan CAP score↓                          | Synbiotic supplementation improves the main features of NAFLD in patients with normal and low BMI, at least partially through the reduction in inflammatory indices.                                                                                                                                |
| Behrouz V 2020      | Iran      | Men and women (20-60 years) | 89                                      | Parallel, double-blind, randomized, placebo-controlled crossover study | Total (5000 million): <i>L. casei</i> , <i>L. rhamnosus</i> , <i>L. acidophilus</i> , <i>B. longum</i> , <i>B. breve</i> , fructo-oligosaccharide. Control: Starch, maltodextrin                                                                                                                                                     | 2 capsules/day                | 12           | ALT↓, AST↓, TC↓, TG↓, GGT↓, ALP↓, LDL-C↓, FBS↓                                                                                       | Probiotics and prebiotics may be beneficial in improving liver enzymes and lipid profiles in patients with NAFLD.                                                                                                                                                                                   |
| Abhari K 2020       | Iran      | Men and women (18-75 years) | 46                                      | Double-blind, randomized, placebo-controlled crossover study           | <i>Bacillus coagulans</i> (GBI-30) (1000 million), Control: maltodextrin                                                                                                                                                                                                                                                             | 1 capsule/day                 | 12           | ALT↓, GGT↓, TNF-α↓, NF-κB↓, Insulin↓, Fibroscan CAP score↓                                                                           | <i>Bacillus coagulans</i> is beneficial for the treatment of NAFLD and its related inflammation without any significant effects on related cardiovascular risk factors.                                                                                                                             |
| Bomhof MR 2019      | Canada    | Men and women (≥18 years)   | 14                                      | Double-blind, randomized, placebo-controlled crossover study           | fructo-oligosaccharide. Control: Starch, maltodextrin                                                                                                                                                                                                                                                                                | 8g 12w/day<br>16g 24w/day     | 36           | TC↓, TG↓, NAS↓, liver fibrosis score→, ALT→, GGT→, ALP→, IL-6→, TNF-α→, Insulin→                                                     | Independent of other lifestyle changes, prebiotic supplementation reduced histologically confirmed steatosis in patients with NASH.                                                                                                                                                                 |
| Scorletti E 2020    | UK        | Men and women (≥18 years)   | 104                                     | Double-blind, randomized, placebo-controlled crossover study           | <i>B. animalis subsp. lactis</i> BB-12 (10000 million), fructo-oligosaccharide 4g. Control: maltodextrin                                                                                                                                                                                                                             | 1 capsule/day                 | 48           | TC↓, TG↓, NAS↓, Fibroscan CAP score→                                                                                                 | Synbiotic treatment was effective in changing gut microbiota but this pro- and prebiotic combination was ineffective in improving liver fat content or liver fibrosis markers in NAFLD.                                                                                                             |
| Chong PL 2021       | UK        | Men and women (25-70 years) | 35                                      | Double-blind, randomized, placebo-controlled crossover study           | Total (4500 million): <i>S. thermophilus</i> , <i>B. breve</i> , <i>B. longum</i> , <i>B. infantis</i> , <i>L. acidophilus</i> , <i>L. plantarum</i> , <i>L. paracasei</i> , <i>L. bulgaricus</i> . Control: maltodextrin                                                                                                            | 2 sachets/day                 | 10           | ALT→, AST→, sVCAM-1→, cGMP→, glutathione ratio→, LHP→, CRP→, HOMA-IR→, ASQ→                                                          | Probiotics did not significantly improve markers of cardiovascular risk and liver injury in patients with NAFLD. However, the study supports an association between endothelial dysfunction and inflammation in patients with NAFLD and suggests that NAFLD is linked with insulin resistance.      |
| Manzhali E 2017     | Ukraine   | Men and women (≥18 years)   | 75                                      | Randomized, controlled, non-blinded, prospective clinical trial        | Total (100 million): <i>L. casei</i> , <i>L. rhamnosus</i> , <i>L. bulgaris</i> , <i>B. longum</i> , <i>S. thermophilus</i> , fructooligosaccharides. Control: low-fat/low-calorie diet                                                                                                                                              | 1 capsule/day                 | 12           | ALT↓, AST↓, GGT→, TC↓, BMI↓, Fibroscan CAP score↓                                                                                    | Short-term treatment with the probiotic cocktail caused significant improvement of liver inflammation status without adverse events.                                                                                                                                                                |
| Kobyliak N 2018     | Ukraine   | Men and women (≥18 years)   | 58                                      | Parallel, double-blind, randomized, placebo-controlled crossover study | <i>L.+ Lactococcus</i> (60000 million), <i>B.</i> (10000 million), <i>Propionibacterium</i> (30000 million), <i>Acetobacter genera</i> (1 million). Control: sachets                                                                                                                                                                 | 1 sachet/day                  | 8            | AST↓, TC↓, TG↓, LDL-C↓, VLDL↓, TNF-α↓, IL-6↓, FLIPL↓, VAI↓, LS→                                                                      | The probiotic “Symbiter” reduces liver fat, aminotransferase activity, and TNF-α and IL-6 levels in NAFLD patients.                                                                                                                                                                                 |
| Ahn SB 2019         | Korea     | Men and women (19-75 years) | 65                                      | Randomized, controlled, non-blinded, prospective clinical trial        | Total (1000 million): <i>L. acidophilus</i> , <i>L. rhamnosus</i> , <i>L. paracasei</i> , <i>Pediococcus pentosaceus</i> , <i>B. lactis</i> , <i>B. breve</i> . Control: dextran, maltodextrin, lemon favor, and Mg stearate                                                                                                         | 1 capsule/day                 | 12           | Body weight↓, BMI↓, total body fat mass↓, percentage of total body fat↓, visceral fat grade↓, TC↓, TG↓, TNF-α↓, Fibroscan CAP score↓ | Treatment with probiotics for 12 weeks resulted in a significant reduction in IHF and body weight in obese NAFLD patients.                                                                                                                                                                          |
| Mohamad Nor MH 2021 | Malaysia  | Men and women (≥18 years)   | 39                                      | Double-blind, randomized, placebo-controlled crossover study           | Total (30000 million): <i>L. acidophilus</i> BCMC 12,130 (107 mg), <i>L. casei subsp.</i> BCMC 12,313 (107 mg), <i>L. lactis</i> BCMC 12,451 (107 mg), <i>B. bifidum</i> BCMC 02290 (107 mg), <i>B. infantis</i> BCMC 02129 (107 mg), <i>B. longum</i> BCMC 02120 (107 mg). Control: sachets                                         | 1 sachet/day                  | 24           | ALT→, AST→, GGT→, TG→, TC→, FBG→, CD4+ T lymphocytes→, CD8+ T lymphocytes→, CAP→, Fibroscan CAP score→                               | Probiotics seemed to be able to stabilize the mucosal immune function and protect NAFLD patients against increased intestinal permeability.                                                                                                                                                         |
| Wong VW 2013        | Hong Kong | Men and women (≥18 years)   | 20                                      | Open-label, randomized, placebo-controlled crossover study             | Total (200 million): <i>L. plantarum</i> ATCC 14917, <i>L. deslbrueckii ssp. bulgaricus</i> ATCC 11842, <i>L. acidophilus</i> (ATCC 4366, <i>L. rhamnosus</i> ATCC 7469, <i>B. bifidum</i> ATCC 29521, fructo-oligosaccharide (3g).Control: General treatment modalities                                                             | 2 sachets/day                 | 24           | Fibroscan CAP score→                                                                                                                 | Probiotic treatment may reduce liver fat and AST levels in NASH patients.                                                                                                                                                                                                                           |
| Chen Y 2019         | China     | Women (36-66 years)         | 92                                      | Double-blind, randomized, placebo-controlled crossover study           | Yogurt: <i>L. delbrueckii ssp. bulgaricus</i> and <i>S. thermophiles</i> . Control: milk                                                                                                                                                                                                                                             | 220g/day                      | 24           | ALT↓, TC↓, TG↓, LPS↓, HFF↓, IHL↓, HOMA-IR↓, Insulin↓, FBG↓, FGF21↓, GSH-Px↑, SOD↑                                                    | Yogurt was better than milk at ameliorating HOMA-IR and liver fat in obese Chinese women with NAFLD and Met S, possibly by improving lipid metabolism, reducing inflammation, oxidative stress, and LPS, and changing the gut microbiota composition.                                               |
| Cai GS 2020         | China     | Men and women (18-59 years) | 140                                     | Double-blind, randomized, placebo-controlled crossover study           | Live Combined <i>B.</i> , <i>L.</i> and Enterococcus Powder. Control: General treatment modalities                                                                                                                                                                                                                                   | 2g/day                        | 12           | ALT↓, AST↓, TC↓, TG↓, GGT↓, HOMA-IR↓, LDL-C↓, NAS↓, HDL-C↑, TBIL→                                                                    | Probiotics can improve some liver functions, glucose and lipids metabolism, hepatic fatty deposition in patients with NAFLD, which will enhance the therapeutic effects of NAFLD.                                                                                                                   |
| Malaguarnera M 2012 | Italy     | Men and women (≥18 years)   | 63                                      | Double-blind, randomized, placebo-controlled crossover study           | <i>B. longum</i> (NS), fructo-oligosaccharide. Control: placebo                                                                                                                                                                                                                                                                      | 1 sachet/day                  | 24           | AST↓, LDL-C↓, CRP↓, TNF-α↓, HOMA-IR↓, NAS↓                                                                                           | <i>B. longum</i> with Fos and lifestyle modification, when compared to lifestyle modification alone, significantly reduces TNF-a, CRP, serum AST levels, HOMA-IR, serum endotoxin, steatosis, and the NASH activity index.                                                                          |
| Aller R 2011        | Spain     | Men and women (≥18 years)   | 28                                      | Double-blind, randomized, placebo-controlled crossover study           | Total (500 million): <i>L. bulgaricus</i> , <i>S. thermophiles</i> . Control: placebo (120mg)                                                                                                                                                                                                                                        | 1 tablet/day                  | 12           | ALT↓, AST↓, GGT↓, LDL-C→, HDL-C→, Insulin levels→, HOMA-IR→, IL-6→, TNF-α→                                                           | 500 million of <i>L. bulgaricus</i> and <i>S. thermophilus</i> , with a randomized clinical design, improved liver aminotransferase levels in patients with NAFLD.                                                                                                                                  |
| Duseja A 2019       | India     | Men and women (≥18 years)   | 30                                      | Double-blind, randomized, controlled crossover study                   | Total (112500 million): <i>L. paracasei</i> DSM 24733, <i>L. plantarum</i> DSM 24730, <i>L. acidophilus</i> DSM 24735, <i>L. delbrueckii subsp. bulgaricus</i> DSM 24734, <i>B. longum</i> DSM 24736, <i>B. infantis</i> DSM 24737, <i>B. breve</i> DSM 24732, <i>S. thermophilus</i> DSM 24731. Control: microcrystalline cellulose | 6 capsules/day                | 48           | ALT↓, TNF-α↓, IL-1β↓, IL-6↓, HOMA-IR→, SIBO→, NAS↓                                                                                   | Patients with NAFLD managed with lifestyle modifications and multistrain probiotic showed significant improvement in liver histology, ALT and cytokines.                                                                                                                                            |
| Escouto GS 2023     | Brazil    | Men and women (≥18 years)   | 48                                      | Parallel, double-blind, randomized, controlled crossover study         | <i>L. acidophilus</i> ATCC SD5221(1000 million), <i>B. lactis</i> HN019 (1000million). Control: maltodextrin                                                                                                                                                                                                                         | 1 capsule/day                 | 24           | ALT↓, AST→, TC→, TG→, LDL-C→, HDL-C→, HbA1cs→, HOMA-IR→, CRP→, FLI→, APRI↓                                                           | Patients with NASH who received probiotics supplementation for 6 months presented improvement in the APRI score after treatment, but supplementation with probiotics alone is not sufficient to improve enzymatic liver markers, inflammatory parameters, and gut microbiota in patients with NASH. |
| Barcelos STA 2023   | Brazil    | Men and women (≥18 years)   | 44                                      | Triple-blind, randomized, controlled crossover study                   | <i>L. acidophilus</i> NCFM (1000million), <i>L. rhamnosus</i> HN001 (1000million), <i>L. paracasei</i> LPC-37 (1000million), <i>B. lactis</i> HN019 (1000million). Control: polydextrose/maltodextrin                                                                                                                                | 2 sachet/day                  | 24           | Castelli’ s Risk Index (CRI)↓, Atherogenic Coefficient (AC)↓, PAI-1↓, miR-122↓, BMI→, CRP→, CK→                                      | A 24-week probiotic mix administration was not superior to placebo in reducing CVR markers in patients with NASH.                                                                                                                                                                                   |
| Crommen S 2022      | Germany   | Men and women (20-65 years) | 48                                      | Parallel, double-blind, randomized, controlled crossover study         | Total ( 1500 million): <i>L. acidophilus</i> , <i>B. breve</i> , <i>B. longum</i> , <i>L. delbrueckii susp. bulgaricus</i> , <i>L. helveticus</i> , <i>L. plantarum</i> , <i>L. rhamnosus</i> , <i>L. casei</i> , <i>L. lactis susp. lactis</i> , <i>S. thermophiles</i> . Control: corn dextrin and rice starch                     | 4g/day                        | 12           | ALT↓, AST→, TC→, TG↓, LDL-C→, HDL-C↑, HbA1cs→, HOMA-IR→, CRP→, FLI→, VAI↓, NAS↓                                                      | Supplementation with a specifically tailored probiotic and micronutrient mixture improved NAFLD-related markers more than a basic micronutrient mixture in obese patients following mini gastric bypass (MGB) surgery.                                                                              |
| Sayari S 2018       | Iran      | Men and women (18-60 years) | 138                                     | Parallel, double-blind, randomized, controlled crossover study         | <i>L. casei</i> , <i>L. rhamnosus</i> , <i>L. acidophilus</i> , <i>L. bulgaricus</i> , <i>B. breve</i> , <i>B. longum</i> , <i>S. thermophilus</i> , fructo-oligosaccharide, magnesium stearate. Control: maltodextrin                                                                                                               | 500mg of each capsule/day     | 16           | ALT↓, TG↓, TC→, HDL-C→, LDL-C↓, FBS↓                                                                                                 | Sitagliptin-synbiotic produced greater improvement in FBS, AST, Cholesterol, and LDL compared to sitagliptin alone in patients with NAFLD.                                                                                                                                                          |

|            |       |                           |    |                          |                                                                             |           |    |                                                                                       |                                                                                                                                                                                                                                     |
|------------|-------|---------------------------|----|--------------------------|-----------------------------------------------------------------------------|-----------|----|---------------------------------------------------------------------------------------|-------------------------------------------------------------------------------------------------------------------------------------------------------------------------------------------------------------------------------------|
| Zhu W 2022 | China | Men and women (≥18 years) | 96 | Double-blind, randomized | <i>Rosuvastatin+Clostridium butyricum</i> (1200mg)<br>Control: Rosuvastatin | 1200g/day | 24 | ALT↑, AST↑, TBIL↓, DBIL↓, TC↓, TG↓, FFA↓, PIIP↓, C-IV↓, HA↓, LN↓, TNF-α↓, CRP↓, IL-6↓ | <i>Clostridium butyricum</i> combined with <i>Rosuvastatin</i> can more effectively improve gut microbiota imbalance, reduce blood lipid levels, alleviate liver fibrosis, and lessen liver function damage in patients with NAFLD. |
|------------|-------|---------------------------|----|--------------------------|-----------------------------------------------------------------------------|-----------|----|---------------------------------------------------------------------------------------|-------------------------------------------------------------------------------------------------------------------------------------------------------------------------------------------------------------------------------------|

AC: Atherogenic Coefficient; ALP: Alkaline Phosphatase; ALT: Alanine Aminotransferase; APRI: AST to Platelet Ratio Index; ASQ: Autism Spectrum Quotient; AST: Aspartate Aminotransferase; *B. Bifidobacterium*; BMI: Body Mass Index; CAP: Controlled Attenuation Parameter; C-IV: Collagen Type IV; CK: Creatine Kinase; CRP: C-Reactive Protein; CRI: Castelli's Risk Index; cGMP: Cyclic Guanosine Monophosphate; CVR: cardiovascular risk; DBIL: Direct Bilirubin; FBG: Fasting Blood Glucose; FGF21: Fibroblast Growth Factor 21; FLIFL: Fatty Liver Infiltration and Fibrosis Score; Fibroscan CAP score: FibroScan Controlled Attenuation Parameter score; GGT: Gamma-Glutamyl Transferase; GSH-Px: Glutathione Peroxidase; HbA1C: Hemoglobin A1C; HDL-C: High-Density Lipoprotein Cholesterol; HFF: Hepatic Fat Fraction; HOMA-IR: Homeostatic Model Assessment of Insulin Resistance; IHL: Intrahepatic Lipid; IL-1β: Interleukin 1 Beta; IL-6: Interleukin 6; *L. Lactobacillus*; LDL-C: Low-Density Lipoprotein Cholesterol; LHP: Lipid Hydroperoxides; LN: Laminin; LPS: Lipopolysaccharides; LS: Liver Stiffness; MGB: Mini Gastric Bypass; Met S: Metabolic Syndrome; NAFLD: Non-Alcoholic Fatty Liver Disease; NAS: NAFLD Activity Score; NASH: Non-Alcoholic Steatohepatitis; NF-κB p65: Nuclear Factor Kappa-light-chain-enhancer of activated B cells p65; PAI-1: Plasminogen Activator Inhibitor-1; PIIP: Procollagen III N-terminal Peptide; QUICKI: Quantitative Insulin Sensitivity Check Index; *S. Streptococcus*; SIBO: Small Intestinal Bacterial Overgrowth; SOD: Superoxide Dismutase; TBIL: Total Bilirubin; TC: Total Cholesterol; TG: Triglycerides; TNF-α: Tumor Necrosis Factor Alpha; VLDL: Very Low-Density Lipoprotein; VAI: Visceral Adiposity Index; ↑: increased; ↓: decreased; ↔: no change

Supplementary Table S2 Baseline characteristics of the included preclinical studies

| Reference               | Country     | Animal model           | No. of animals | Sex/age (wk) | Weight change | No. of groups | No. of animals per group | CRC induction      | Control group | Probiotic/synbiotic                                                                                | Method of administration | Daily dose                           | Duration of intervention (wk) | Post-intervention outcomes                                                                                                                                                                                                                   | Study objective                                                                                                                                                                                                                                                                                                                                                                                                                                                                                                                                                                                                                                                                  |
|-------------------------|-------------|------------------------|----------------|--------------|---------------|---------------|--------------------------|--------------------|---------------|----------------------------------------------------------------------------------------------------|--------------------------|--------------------------------------|-------------------------------|----------------------------------------------------------------------------------------------------------------------------------------------------------------------------------------------------------------------------------------------|----------------------------------------------------------------------------------------------------------------------------------------------------------------------------------------------------------------------------------------------------------------------------------------------------------------------------------------------------------------------------------------------------------------------------------------------------------------------------------------------------------------------------------------------------------------------------------------------------------------------------------------------------------------------------------|
| Zhou D 2017             | China       | C57BL/6 mice           | 30             | male         | decline       | 3             | 10                       | HFD, for 16 wk     | HFD+PBS       | <i>Clostridium butyricum</i> B1                                                                    | Oral gavage              | 10 <sup>9</sup> CFU/g of body weight | 8                             | ALT↓, AST↓, FBG↓, HOMA-IR↓, TNF-α↓, MCP-1↓, IL-1β↓, IL-2↓, IL-6↓, IL-10↓, IFN-γ↓, IL-17↓, Foxp3↑, IL-4↑, IL-22↑                                                                                                                              | Clostridium butyricum B1 could attenuate HFD-induced steatohepatitis in mice partially through butyrate-induced enterohepatic immunoregulation.                                                                                                                                                                                                                                                                                                                                                                                                                                                                                                                                  |
| Yang T 2020             | China       | C57BLKS/J (db/db) mice | 27             | male         | NS            | 4             | 8/6/7/6                  | normal diet        | normal diet   | <i>Clostridium butyricum</i>                                                                       | Oral gavage              | 5*10 <sup>9</sup> CFU/Kg             | 6                             | ALT↓, AST↓, TG↓, ALP↓, LDLCL, T-CHO↓, IL-1β↓, IL-6↓, TNF-α↓, ZO-1(+) <sup>↑</sup> , occludin(+) <sup>↑</sup> , TGR5↑, GLP-1↑                                                                                                                 | Clostridium butyricum exerts a hepatoprotective effect by promoting GLP-1 secretion through the increased expression of TGR5 protein mediated by intestinal tight junctions (TJs). It demonstrates potential therapeutic efficacy in reducing lipid accumulation and inflammation in NAFLD mouse models.                                                                                                                                                                                                                                                                                                                                                                         |
| Raftar SKA 2021         | Iran        | C57BL/6 mice           | 25             | male         | NS            | 5             | 5                        | HFD+CCL4, for 4 wk | HFD+PBS       | <i>A. muciniphila</i> MucT (ATCC BAA-835)                                                          | Oral gavage              | 10 <sup>9</sup> CFU/200μl            | 4                             | ALT↓, AST↓, TC↓, TG↓, LDL↓, VLDL↓, TNF-a↓, IL-6↓, a-SMA↓, PDGF↓, TGF-b↓, TLR-2↓, TLR-4↓, TNF-a↓, L-10↓, HDL↑, SCFAs↑, Primary bile acids↑, SCFAs↑, Cyp7a1 unchanged, Cyp8b1↑, Ntcp↑, Bsep↑, Mrp2↑, Fatp5↑, Baat↑, Lxrα↑, Fxr↑, Shp unchanged | Oral administration of live and pasteurized <i>A. muciniphila</i> and its EVs could normalize the fecal targeted bacteria composition, improve the intestinal permeability, modulate inflammatory responses, and subsequently prevent liver injury in HFD/CCl4-administered mice.                                                                                                                                                                                                                                                                                                                                                                                                |
| Juárez-Fernández M 2021 | Spain       | Wistar rats            | 56             | male         | NS            | 8             | 7                        | HFD, for 6 wk      | HFD+PBS       | <i>A. muciniphila</i> (CIP-107961T)                                                                | Oral gavage              | 2*10 <sup>8</sup> CFU/200μl          | 3                             | IL-6↓, TNF-α↓, TLR-5↓, TLR-9↓, IL-1β↓, PPAR-α↓, PPAR-γ↑, IL-10↑                                                                                                                                                                              | <i>A. muciniphila</i> demonstrates potential positive effects in alleviating obesity features induced by a high-fat diet, modulating gut microbiota composition, increasing plasma bile acid levels, and influencing factors related to the gut microbiota, bile acids, and liver gene expression.                                                                                                                                                                                                                                                                                                                                                                               |
| Raftar SKA 2022         | Iran        | C57BL/6J mice          | 25             | male         | NS            | 5             | 5                        | HFD+CCL4, for 4 wk | HFD+PBS       | <i>A. muciniphila</i> MucT (ATCC BAA-835)                                                          | Oral gavage              | 10 <sup>9</sup> CFU/200μl            | 4                             |                                                                                                                                                                                                                                              | The present results showed that oral administration of <i>A. muciniphila</i> and its derivatives for four weeks could enhance the intestinal integrity and anti-inflammatory responses of the colon, adipose, and liver tissues and subsequently prevent liver injury in HFD/CCL4 mice.                                                                                                                                                                                                                                                                                                                                                                                          |
| Hu W 2022               | China       | C57BL/6J mice          | 30             | male         | decline       | 3             | 10                       | HFD                | HFD+PBS       | <i>F. prausnitzii</i> (A2-165, JZ10, JZ27, LA8, LB8, QL13, QL33, SM10, ZF21, HW29, PL45, and LC49) | Oral gavage              | 10 <sup>9</sup> CFU of body          | 12                            | ALT↓, AST↓, FFAs↓, TC↓, TG↓, LDL-C↓, HDL-C↑, fat tissue index↓, GSH-PX↑, SOD↑, MDA↓, adipocyte size↓, TNF-α↓, IL-6↓, FBG↓, fasting insulin↓, HOMA-IR↓, acetate↑, propionate↑, butyrate↑, iso-butyrate unchanged                              | <i>F. prausnitzii</i> LB8 and LC49 significantly ameliorated the symptoms associated with a mouse model of NAFLD, restored the gut microbial dysbiosis, and modulated the gut microbial functional pathways and SCFAs production.                                                                                                                                                                                                                                                                                                                                                                                                                                                |
| Shin JH 2023            | Korea       | C57BL/6 mice           | 96             | female       | invariably    | 8             | 12                       | HFHF               | HFHF          | <i>F. prausnitzii</i> (A2-165, EB-FPKD3, EB-FPKD9, EB-FPKD11, EB-FPYK1)                            | Oral (in diet)           | 10 <sup>8</sup> CFU                  | 9                             | TC↓, TG↓, TNF-α↓, TLR4↓, MCP-1↓, IL-6↓, CD36↓, FATP5↓, PPAR-γ↓, SREBP-1c↓, FAS↓, LPL↓, Col1a1↓, TIMP-1↓, ZO-1(+) <sup>↑</sup> , occludin(+) <sup>↑</sup>                                                                                     | <i>F. prausnitzii</i> in the treatment of NASH is characterized by its anti-inflammatory effects, improvement of glucose homeostasis, restoration of gut barrier function, and reduction of liver damage through the activation of the Nrf2 pathway with butyric acid                                                                                                                                                                                                                                                                                                                                                                                                            |
| Li T 2022               | China       | C57BL/6J mice          | 24             | male         | invariably    | 4             | 6                        | HFD+STZ, for 10 wk | HFD+PBS       | <i>A. muciniphila</i> (AM06, AM02)                                                                 | Oral gavage              | 10 <sup>9</sup> CFU of body          | 10                            | Number and maximum diameter of liver tumor nodules↓, AST↓, IL-6↓                                                                                                                                                                             | Administration of breast milk-isolated <i>A. muciniphila</i> (AM06) but not feces-isolated <i>A. muciniphila</i> (AM02) could improve NASH severity. Interestingly, breast milk-isolated <i>A. muciniphila</i> treatment suppressed the progression of NASH to HCC, accompanied with an increased hepatic CXCR6+ natural killer T (NKT) cell and decreased macrophage infiltration.                                                                                                                                                                                                                                                                                              |
| Han Y 2023              | China       | C57BL/6J mice          | 18             | male         | decline       | 3             | 6                        | HFD, for 20 wk     | HFD+PBS       | <i>A. muciniphila</i> MucT (ATCC BAA-835)                                                          | Oral gavage              | 10 <sup>9</sup> CFU/200μl            | 20                            | ALT↓, AST↓, FBG↓, TC↓, hepatic γδT cells↓, hepatic γδT17 cells↓, hepatic proinflammatory M1 macrophages↓, hepatic TLR2↓, propionic↑, 2-methylbutyric↑, isovaleric↑, valeric↓.                                                                | <i>A. muciniphila</i> supplementation prevented hepatic inflammation in high-fat diet-induced NASH mice, characterized by reduced hepatic proinflammatory macrophages (M1) and γδT and γδT17 cells. Furthermore, <i>A. muciniphila</i> inhibited intestinal barrier disruption and accordingly downregulated hepatic Toll-like receptor 2 (TLR2) expression in NASH mice. <i>A.muciniphila</i> prevented NASH by modulating TLR2-activated γδT17 cells and further macrophage polarization.                                                                                                                                                                                      |
| Kim S 2020              | Korea       | C57BL/6N mice          | 20             | male         | invariably    | 4             | 5                        | HFD, for 5 wk      | HFD+PBS       | <i>A. muciniphila</i> MucT (ATCC BAA-835)                                                          | Oral gavage              | 10 <sup>9</sup> CFU/ml               | 10                            | ALT↓, AST↓, TG↓, SREBP↓, IL-6↓                                                                                                                                                                                                               | Oral administration of <i>A. muciniphila</i> significantly (P < 0.05) lowered serum triglyceride (TG) and alanine aminotransferase (ALT) levels in obese mice. Compared to the non- <i>A. muciniphila</i> -treated group, the expression of SREBP (regulator of TG synthesis in liver tissue) was decreased in the <i>A. muciniphila</i> -treated group. The expression of IL-6 in the liver of obese mice was decreased following the administration of <i>A. muciniphila</i> . Furthermore, alterations in the ratio of Firmicutes to Bacteroidetes and the decrease in bacterial diversity caused by the HFD were restored upon the administration of <i>A. muciniphila</i> . |
| Morrison MC 2022        | Netherlands | Ldlr.Leiden mice       | 36             | male         | invariably    | 3             | 15/15/6                  | HFD, for 28 wk     | HFD           | Heat-inactivated <i>A. muciniphila</i>                                                             | Oral (in diet)           | 2*10 <sup>8</sup> CFU of body        | 28                            | Intestinal permeability↓, butyrate↑, valeric↓                                                                                                                                                                                                | Heat-inactivated <i>A. muciniphila</i> can improve obesity-induced gut permeability and associated basal lamina turnover markers (PRO-C4) and has minor effects on tissues in close proximity to the gut, i.e., mesenteric white adipose tissue hypertrophy.                                                                                                                                                                                                                                                                                                                                                                                                                     |
| Lensu S 2020            | Finland     | Wistar rats            | 40             | male         | NS            | 4             | 10                       | HFD                | HFD           | <i>F. prausnitzii</i> (ATCC 27766 and DSM A2-165) Xylo-oligosaccharides                            | Oral (in diet)           | 0.05 g/kg                            | 12                            | TC↓, β-HAD↑,                                                                                                                                                                                                                                 | XOS increased <i>F. prausnitzii</i> growth, having only a minor impact on the GM composition. When supplemented with HFD, XOS ameliorated hepatic steatosis. The underlying mechanisms involved enhanced hepatic β-oxidation and mitochondrial respiration.                                                                                                                                                                                                                                                                                                                                                                                                                      |

*A. muciniphila*: Akkermansia muciniphila; ALP: Alkaline Phosphatase; ALT: Alanine Aminotransferase; AST: Aspartate Aminotransferase; Baat: Bile Acid-CoA: Amino Acid N-Acyltransferase; Bsep: Bile Salt Export Pump; CCl4: Carbon Tetrachloride; CD36/Col1a1: Collagen Type I Alpha 1 Chain; CFU: colony-forming unit; Cyp7a1: Cytochrome P450 7A1; Cyp8b1: Cytochrome P450 8B1; EVs: Extracellular Vesicles; *F. prausnitzii*: Faecalibacterium prausnitzii; FAS: Fatty Acid Synthase; Fatp5: Fatty Acid Transport Protein 5; FBG: Fasting Blood Glucose; FFAs: Free Fatty Acids; Foxp3: Forkhead Box P3; Fxr: Farnesoid X Receptor; GLP-1: Glucagon-Like Peptide-1; GSH-PX: Glutathione Peroxidase; HDL: High-Density Lipoprotein; HDL-C: High-Density Lipoprotein Cholesterol; HFD: High-Fat Diet; HOMA-IR: Homeostatic Model Assessment of Insulin Resistance; IFN-γ: Interferon Gamma; IL-1β: Interleukin 1 Beta; IL-2: Interleukin 2; IL-4: Interleukin 4; IL-6: Interleukin 6; IL-10: Interleukin 10; IL-17: Interleukin 17; IL-22: Interleukin 22; LDL: Low-Density Lipoprotein; LDL-C: Low-Density Lipoprotein Cholesterol; LPL: Lipoprotein Lipase; Lxra: Liver X Receptor Alpha; MCP-1: Monocyte Chemoattractant Protein-1; MDA: Malondialdehyde; Mrp2: Multidrug Resistance Protein 2; Ntcp: Sodium Taurocholate Co-transporting Polypeptide; PDGF: Platelet-Derived Growth Factor; PPAR-α: Peroxisome Proliferator-Activated Receptor Alpha; PPAR-γ: Peroxisome Proliferator-Activated Receptor Gamma; SOD: Superoxide Dismutase; SREBP: Sterol Regulatory Element-Binding Protein; SREBP-1c: Sterol Regulatory Element-Binding Protein 1c; STZ: Streptozotocin; TC: Total Cholesterol; TG: Triglycerides; TGF-β: Transforming Growth Factor Beta; TIMP-1: Tissue Inhibitor of Metalloproteinases 1; TLR-2: Toll-Like Receptor 2; TLR-4: Toll-Like Receptor 4; TLR-5: Toll-Like Receptor 5; TLR-9: Toll-Like Receptor 9; TNF-α: Tumor Necrosis Factor Alpha; T-CHO: Total Cholesterol; TLR2: Toll-Like Receptor 2; VLDL: Very Low-Density Lipoprotein; XOS: Xylo-oligosaccharide; ZO-1(+): Zonula Occludens-1; ↑: increased; ↓: decreased; ↔: no change

Supplementary Table S3 Subgroup analysis

| Nation | Marker              | MD      | 95% CI           | P-value | I <sup>2</sup> | P-subgroup |
|--------|---------------------|---------|------------------|---------|----------------|------------|
| Iran   | ALT                 | -11.399 | -20.147, -2.651  | 0.020   | 95%            | < 0.0001   |
| Iran   | AST                 | -10.339 | -18.377, -2.302  | 0.023   | 64.6%          | 0.009      |
| Iran   | TC                  | -25.560 | -43.413, -7.702  | 0.025   | 0%             | < 0.0001   |
| Iran   | TG                  | -22.462 | -26.423, -18.502 | 0.015   | 4.1%           | < 0.0001   |
| Iran   | BMI                 | -0.254  | -0.442, -0.066   | 0.013   | 0%             | < 0.0001   |
| Iran   | Fibroscan CAP score | -1.638  | -3.242, -0.033   | 0.047   | 66.1%          | < 0.0001   |

ALT: Alanine Aminotransferase; AST: Aspartate Aminotransferase; BMI: Body Mass Index; CFU: colony-forming unit; TC: Total Cholesterol; TG: Triglycerides; Fibroscan CAP score: FibroScan Controlled Attenuation Parameter score

Supplementary Table S4 Meta-regression output

| Model         |    |                            | ALT            |                       |                |         |    | AST                       |                |                       |                |         | GGT |                           |                |                       |                | FBG     |    |                          |                |                       |                |         |
|---------------|----|----------------------------|----------------|-----------------------|----------------|---------|----|---------------------------|----------------|-----------------------|----------------|---------|-----|---------------------------|----------------|-----------------------|----------------|---------|----|--------------------------|----------------|-----------------------|----------------|---------|
| No covariates | N  | Coeff. (95% CI)            | τ <sup>2</sup> | Adj. R <sup>2</sup> % | I <sup>2</sup> | p Value | N  | Coeff. (95% CI)           | τ <sup>2</sup> | Adj. R <sup>2</sup> % | I <sup>2</sup> | p Value | N   | Coeff. (95% CI)           | τ <sup>2</sup> | Adj. R <sup>2</sup> % | I <sup>2</sup> | p Value | N  | Coeff. (95% CI)          | τ <sup>2</sup> | Adj. R <sup>2</sup> % | I <sup>2</sup> | p Value |
| Univariate    |    |                            |                |                       |                |         |    |                           |                |                       |                |         |     |                           |                |                       |                |         |    |                          |                |                       |                |         |
| CFU           | 14 | 0.0001 (-0.0001, 0.0002)   | 7.7720         | 5.03%                 | 97.12%         | 0.3607  | 11 | 0.0001 (-0.0002, 0.0003)  | 6.5135         | 0                     | 72.45%         | 0.6286  | 8   | 0.0009 (-0.0015, 0.0034)  | 8.0889         | 0                     | 95.93%         | 0.4473  | 8  | 0.0010 (0.0001, 0.0019)  | 0              | 100%                  | 0.00%          | 0.0304  |
| ALT baseline  | 20 | -0.1868 (-0.3500, -0.0235) | 5.6976         | 25.54%                | 88.96%         | 0.0249  | 11 | -0.1034 (-0.3858, 0.1790) | 6.6438         | 0                     | 70.37%         | 0.4730  | 11  | -0.0276 (-0.5974, 0.5422) | 8.8290         | 0                     | 92.18%         | 0.9244  | 12 | 0.0371 (-0.0426, 0.1167) | 0              | 100%                  | 0              | 0.3233  |
| AST baseline  | 19 | -0.2422 (-0.4177, -0.0727) | 5.3851         | 36.55%                | 86.91%         | 0.0051  | 11 | -0.1958 (-0.4703, 0.0787) | 5.5751         | 21.47%                | 60.80%         | 0.1621  | 10  | -0.2933 (-0.7414, 0.1549) | 7.5107         | 15.92%                | 85.33%         | 0.1997  | 12 | 0.0186 (-0.0574, 0.0946) | 0.9357         | 0                     | 11.44%         | 0.6311  |
| Age           | 19 | 1.0050 (0.2696, 1.7404)    | 5.7148         | 29.31%                | 88.02%         | 0.0074  | 11 | 0.5045 (-0.1970, 1.2061)  | 5.5592         | 21.92%                | 59.53%         | 0.1587  | 11  | 0.8773 (-0.4442, 2.1989)  | 7.6478         | 8.59%                 | 92.21%         | 0.1932  | 12 | 0.1060 (-0.1703, 0.3824) | 1.5466         | 0                     | 17.20%         | 0.4520  |

| Model         |    |                           | TC             |                       |                |         |    | TG                         |                |                       |                |         | BMI |                          |                |                       |                | Fibroscan CAP score |   |                           |                |                       |                |         |
|---------------|----|---------------------------|----------------|-----------------------|----------------|---------|----|----------------------------|----------------|-----------------------|----------------|---------|-----|--------------------------|----------------|-----------------------|----------------|---------------------|---|---------------------------|----------------|-----------------------|----------------|---------|
| No covariates | N  | Coeff. (95% CI)           | τ <sup>2</sup> | Adj. R <sup>2</sup> % | I <sup>2</sup> | p Value | N  | Coeff. (95% CI)            | τ <sup>2</sup> | Adj. R <sup>2</sup> % | I <sup>2</sup> | p Value | N   | Coeff. (95% CI)          | τ <sup>2</sup> | Adj. R <sup>2</sup> % | I <sup>2</sup> | p Value             | N | Coeff. (95% CI)           | τ <sup>2</sup> | Adj. R <sup>2</sup> % | I <sup>2</sup> | p Value |
| Univariate    |    |                           |                |                       |                |         |    |                            |                |                       |                |         |     |                          |                |                       |                |                     |   |                           |                |                       |                |         |
| CFU           | 9  | 0.0001 (-0.0001, 0.0004)  | 11.6302        | 0                     | 77.08%         | 0.3578  | 12 | 0.0004 (-0.0000, 0.0008)   | 10.6041        | 17.89%                | 83.22%         | 0.0770  | 10  | 0.0001 (-0.0001, 0.0003) | 0.7947         | 17.22%                | 83.66%         | 0.1983              | 8 | 0.0001 (-0.0001, 0.0003)  | 0.8703         | 0                     | 88.13%         | 0.2644  |
| ALT baseline  | 14 | -0.1836 (-0.5296, 0.1623) | 12.7425        | 0                     | 83.84%         | 0.2982  | 17 | -0.3876 (-0.8333, 0.0581)  | 9.9583         | 23.79%                | 81.67%         | 0.0883  | 13  | 0.0080 (-0.0146, 0.0306) | 0.8119         | 0                     | 84%            | 0.4873              | 8 | 0.0237 (-0.0206, 0.0680)  | 0.8632         | 0.20%                 | 84.18%         | 0.2945  |
| AST baseline  | 13 | -0.2147 (-0.5626, 0.1333) | 12.3511        | 6.03%                 | 92.77%         | 0.2266  | 16 | -0.6443 (-1.0299, -0.2588) | 6.1253         | 73.36%                | 50.50%         | 0.0011  | 13  | 0.0117 (-0.0100, 0.0334) | 0.7850         | 3.95%                 | 82.14%         | 0.2906              | 8 | -0.0383 (-0.1001, 0.0235) | 0.8208         | 9.75%                 | 82.88%         | 0.2243  |
| Age           | 12 | 1.8456 (1.0162, 2.6750)   | 5.3212         | 83.09%                | 35.90%         | <.0001  | 15 | 1.8879 (0.6274, 3.1484)    | 8.1907         | 57.11%                | 50.81%         | 0.0033  | 13  | 0.0164 (-0.0836, 0.1160) | 0.8316         | 0                     | 87.89%         | 0.7482              | 8 | 0.0049 (-0.1709, 0.1807)  | 0.9688         | 0                     | 90.41%         | 0.9565  |

ALT: Alanine Aminotransferase; AST: Aspartate Aminotransferase; BMI: Body Mass Index; CFU: colony-forming unit; FBG: Fasting Blood Glucose; GGT: Gamma-Glutamyl Transferase; TC: Total Cholesterol; TG: Triglycerides
